# Supplementary material for: Comparative transcriptional profiling identifies takeout as a gene that regulates life span
Source: publisher site journal article supplement (doi:10.18632/aging.100146), 2010-05-11
Supplement: Supplementary file [file aging-v2i5-100146-supplementary-material-ST1.pdf]

Table S1A: Gene Ontologies Up-regulated in yw, w1118 DR. All gene ontologies have at least 5 genes in the GO and p value < 0.05.

|           |                                                                      |
|-----------|----------------------------------------------------------------------|
| GO:000038 | very-long-chain fatty acid metabolic process                         |
| GO:000122 | negative regulation of transcription from RNA polymerase II promoter |
| GO:000267 | cell fraction                                                        |
| GO:000270 | peptidoglycan metabolic process                                      |
| GO:000902 | cell morphogenesis                                                   |
| GO:000904 | cell development                                                     |
| GO:001505 | regulation of neurotransmitter levels                                |
| GO:001704 | formation of primary germ layer                                      |
| GO:001706 | endoderm formation                                                   |
| GO:001707 | mesoderm formation                                                   |
| GO:001708 | cell fate commitment                                                 |
| GO:001709 | cell fate commitment                                                 |
| GO:001710 | mesodermal cell fate commitment                                      |
| GO:001736 | establishment of planar polarity                                     |
| GO:001738 | morphogenesis of a polarized epithelium                              |
| GO:001751 | compound eye photoreceptor cell differentiation                      |
| GO:001752 | compound eye photoreceptor fate commitment                           |
| GO:001754 | eye photoreceptor cell differentiation                               |
| GO:001871 | pattern binding                                                      |
| GO:002117 | larval development (sensu Amphibia)                                  |
| GO:002164 | larval development                                                   |
| GO:002165 | instar larval or pupal development                                   |
| GO:002376 | immune system process                                                |
| GO:003006 | reproductive developmental process                                   |
| GO:003008 | system process                                                       |
| GO:003700 | transcription factor activity                                        |
| GO:003702 | RNA polymerase II transcription factor activity                      |
| GO:003704 | specific RNA polymerase II transcription factor activity             |
| GO:003779 | actin binding                                                        |
| GO:004035 | alkaline phosphatase activity                                        |
| GO:004175 | endopeptidase activity                                               |
| GO:004179 | membrane alanyl aminopeptidase activity                              |
| GO:004180 | carboxypeptidase activity                                            |
| GO:004222 | metalloendopeptidase activity                                        |
| GO:004252 | serine-type endopeptidase activity                                   |
| GO:004263 | chymotrypsin activity                                                |
| GO:004295 | trypsin activity                                                     |
| GO:004723 | calcium-dependent protein serine/threonine phosphatase activity      |
| GO:005102 | receptor binding                                                     |
| GO:005179 | hormone activity                                                     |
| GO:005184 | neuropeptide hormone activity                                        |
| GO:005200 | structural constituent of cytoskeleton                               |
| GO:005275 | amine transmembrane transporter activity                             |
| GO:005283 | sodium:amino acid symporter activity                                 |
| GO:005326 | neurotransmitter transporter activity                                |
| GO:005328 | neurotransmitter:sodium symporter activity                           |
| GO:005342 | organic acid transmembrane transporter activity                      |
| GO:005416 | cation:amino acid symporter activity                                 |
| GO:005509 | calcium ion binding                                                  |
| GO:005515 | protein binding                                                      |
| GO:005516 | calmodulin binding                                                   |
| GO:005549 | odorant binding                                                      |
| GO:005578 | proteinaceous extracellular matrix                                   |
| GO:005604 | basement membrane                                                    |
| GO:005624 | membrane fraction                                                    |
| GO:005792 | microsome                                                            |
| GO:005859 | muscle myosin complex                                                |
| GO:005865 | sarcomere                                                            |
| GO:005886 | plasma membrane                                                      |

|            |                                                                                   |
|------------|-----------------------------------------------------------------------------------|
| GO:0005887 | integral to plasma membrane                                                       |
| GO:0005911 | intercellular junction                                                            |
| GO:0005912 | adherens junction                                                                 |
| GO:0005913 | cell-cell adherens junction                                                       |
| GO:0006357 | regulation of transcription from RNA polymerase II promoter                       |
| GO:0006508 | proteolysis                                                                       |
| GO:0006576 | biogenic amine metabolic process                                                  |
| GO:0006582 | melanin metabolic process                                                         |
| GO:0006629 | lipid metabolic process                                                           |
| GO:0006810 | transport                                                                         |
| GO:0006811 | ion transport                                                                     |
| GO:0006812 | cation transport                                                                  |
| GO:0006817 | phosphate transport                                                               |
| GO:0006820 | anion transport                                                                   |
| GO:0006874 | cellular calcium ion homeostasis                                                  |
| GO:0006928 | cell motility                                                                     |
| GO:0006952 | defense response                                                                  |
| GO:0006955 | immune response                                                                   |
| GO:0006959 | humoral immune response                                                           |
| GO:0007015 | actin filament organization                                                       |
| GO:0007043 | intercellular junction assembly                                                   |
| GO:0007154 | cell communication                                                                |
| GO:0007155 | cell adhesion                                                                     |
| GO:0007164 | establishment of tissue polarity                                                  |
| GO:0007165 | signal transduction                                                               |
| GO:0007166 | cell surface receptor linked signal transduction                                  |
| GO:0007167 | enzyme linked receptor protein signaling pathway                                  |
| GO:0007169 | transmembrane receptor protein tyrosine kinase signaling pathway                  |
| GO:0007186 | G-protein coupled receptor protein signaling pathway                              |
| GO:0007200 | G-protein signaling, coupled to IP3 second messenger (phospholipase C activating) |
| GO:0007218 | neuropeptide signaling pathway                                                    |
| GO:0007242 | intracellular signaling cascade                                                   |
| GO:0007267 | cell-cell signaling                                                               |
| GO:0007268 | synaptic transmission                                                             |
| GO:0007275 | multicellular organismal development                                              |
| GO:0007385 | specification of segmental identity, abdomen                                      |
| GO:0007399 | nervous system development                                                        |
| GO:0007402 | ganglion mother cell fate determination                                           |
| GO:0007405 | generation of neurons                                                             |
| GO:0007409 | axonogenesis                                                                      |
| GO:0007411 | axonogenesis                                                                      |
| GO:0007416 | synaptogenesis                                                                    |
| GO:0007417 | central nervous system development                                                |
| GO:0007419 | ventral cord development                                                          |
| GO:0007422 | nervous system development                                                        |
| GO:0007424 | open tracheal system development                                                  |
| GO:0007427 | epithelial cell migration, open tracheal system                                   |
| GO:0007431 | salivary gland development                                                        |
| GO:0007432 | salivary gland boundary specification                                             |
| GO:0007435 | salivary gland morphogenesis                                                      |
| GO:0007439 | ectodermal gut development                                                        |
| GO:0007444 | imaginal disc development                                                         |
| GO:0007447 | imaginal disc development                                                         |
| GO:0007450 | dorsal/ventral pattern formation, imaginal disc                                   |
| GO:0007451 | dorsal/ventral pattern formation, imaginal disc                                   |
| GO:0007472 | wing disc morphogenesis                                                           |
| GO:0007473 | wing disc proximal/distal pattern formation                                       |
| GO:0007476 | imaginal disc-derived wing morphogenesis                                          |
| GO:0007478 | leg disc morphogenesis                                                            |
| GO:0007480 | imaginal disc-derived leg morphogenesis                                           |
| GO:0007482 | haltere development                                                               |
| GO:0007492 | endoderm development                                                              |

|            |                                                                    |
|------------|--------------------------------------------------------------------|
| GO:0007494 | midgut development                                                 |
| GO:0007498 | mesoderm development                                               |
| GO:0007500 | mesodermal cell fate determination                                 |
| GO:0007506 | gonad development                                                  |
| GO:0007507 | heart development                                                  |
| GO:0007517 | muscle development                                                 |
| GO:0007519 | skeletal muscle development                                        |
| GO:0007525 | somatic muscle development                                         |
| GO:0007528 | skeletal muscle fiber development                                  |
| GO:0007548 | sex differentiation                                                |
| GO:0007552 | metamorphosis                                                      |
| GO:0007600 | sensory perception                                                 |
| GO:0007601 | visual perception                                                  |
| GO:0007602 | phototransduction                                                  |
| GO:0007619 | courtship behavior                                                 |
| GO:0007622 | rhythmic behavior                                                  |
| GO:0007623 | circadian rhythm                                                   |
| GO:0007632 | visual behavior                                                    |
| GO:0008020 | G-protein coupled photoreceptor activity                           |
| GO:0008063 | Toll signaling pathway                                             |
| GO:0008083 | growth factor activity                                             |
| GO:0008084 | imaginal disc growth factor activity                               |
| GO:0008092 | cytoskeletal protein binding                                       |
| GO:0008194 | UDP-glycosyltransferase activity                                   |
| GO:0008233 | peptidase activity                                                 |
| GO:0008235 | metalloexopeptidase activity                                       |
| GO:0008236 | serine-type peptidase activity                                     |
| GO:0008237 | metallopeptidase activity                                          |
| GO:0008238 | exopeptidase activity                                              |
| GO:0008241 | peptidyl-dipeptidase activity                                      |
| GO:0008253 | 5'-nucleotidase activity                                           |
| GO:0008271 | secondary active sulfate transmembrane transporter activity        |
| GO:0008277 | regulation of G-protein coupled receptor protein signaling pathway |
| GO:0008305 | integral to plasma membrane                                        |
| GO:0008324 | cation transmembrane transporter activity                          |
| GO:0008406 | gonad development                                                  |
| GO:0008507 | sodium:iodide symporter activity                                   |
| GO:0008509 | anion transmembrane transporter activity                           |
| GO:0008543 | fibroblast growth factor receptor signaling pathway                |
| GO:0008544 | ectoderm development                                               |
| GO:0008586 | imaginal disc-derived wing morphogenesis                           |
| GO:0009253 | peptidoglycan catabolic process                                    |
| GO:0009309 | amine biosynthetic process                                         |
| GO:0009314 | response to radiation                                              |
| GO:0009416 | response to light stimulus                                         |
| GO:0009581 | detection of external stimulus                                     |
| GO:0009582 | detection of abiotic stimulus                                      |
| GO:0009583 | detection of light stimulus                                        |
| GO:0009584 | detection of visible light                                         |
| GO:0009586 | rhodopsin mediated phototransduction                               |
| GO:0009595 | detection of biotic stimulus                                       |
| GO:0009605 | response to external stimulus                                      |
| GO:0009607 | response to biotic stimulus                                        |
| GO:0009611 | response to wounding                                               |
| GO:0009617 | response to bacterium                                              |
| GO:0009628 | response to abiotic stimulus                                       |
| GO:0009653 | anatomical structure development                                   |
| GO:0009791 | multicellular organismal development                               |
| GO:0009881 | photoreceptor activity                                             |
| GO:0009887 | organ morphogenesis                                                |
| GO:0009888 | organ development                                                  |
| GO:0009954 | proximal/distal pattern formation                                  |

|            |                                                                                           |
|------------|-------------------------------------------------------------------------------------------|
| GO:0009991 | response to extracellular stimulus                                                        |
| GO:0010160 | formation of organ boundary                                                               |
| GO:0014706 | striated muscle development                                                               |
| GO:0015020 | glucuronosyltransferase activity                                                          |
| GO:0015075 | ion transmembrane transporter activity                                                    |
| GO:0015101 | organic cation transmembrane transporter activity                                         |
| GO:0015116 | sulfate transmembrane transporter activity                                                |
| GO:0015145 | monosaccharide transmembrane transporter activity                                         |
| GO:0015179 | L-amino acid transmembrane transporter activity                                           |
| GO:0015291 | secondary active transmembrane transporter activity                                       |
| GO:0015293 | symporter activity                                                                        |
| GO:0015294 | solute:cation symporter activity                                                          |
| GO:0015296 | anion:cation symporter activity                                                           |
| GO:0015355 | secondary active monocarboxylate transmembrane transporter activity                       |
| GO:0015370 | solute:sodium symporter activity                                                          |
| GO:0015373 | monovalent anion:sodium symporter activity                                                |
| GO:0015381 | high affinity sulfate transmembrane transporter activity                                  |
| GO:0015629 | actin cytoskeleton                                                                        |
| GO:0015698 | inorganic anion transport                                                                 |
| GO:0016020 | membrane                                                                                  |
| GO:0016021 | integral to membrane                                                                      |
| GO:0016023 | cytoplasmic membrane-bound vesicle                                                        |
| GO:0016027 | rhabdomere                                                                                |
| GO:0016028 | rhabdomere                                                                                |
| GO:0016044 | membrane organization and biogenesis                                                      |
| GO:0016045 | detection of bacterium                                                                    |
| GO:0016059 | deactivation of rhodopsin mediated signaling                                              |
| GO:0016079 | neurotransmitter secretion                                                                |
| GO:0016284 | alanine aminopeptidase activity                                                           |
| GO:0016459 | actin cytoskeleton                                                                        |
| GO:0016460 | myosin II complex                                                                         |
| GO:0016477 | cell migration                                                                            |
| GO:0016511 | endothelin-converting enzyme activity                                                     |
| GO:0016566 | specific transcriptional repressor activity                                               |
| GO:0016787 | hydrolase activity                                                                        |
| GO:0016791 | phosphoric monoester hydrolase activity                                                   |
| GO:0016810 | hydrolase activity, acting on carbon-nitrogen (but not peptide) bonds                     |
| GO:0016811 | hydrolase activity, acting on carbon-nitrogen (but not peptide) bonds, in linear amides   |
| GO:0016814 | hydrolase activity, acting on carbon-nitrogen (but not peptide) bonds, in cyclic amidines |
| GO:0017171 | serine hydrolase activity                                                                 |
| GO:0019226 | transmission of nerve impulse                                                             |
| GO:0019722 | calcium-mediated signaling                                                                |
| GO:0019730 | antimicrobial humoral response                                                            |
| GO:0019731 | antibacterial humoral response                                                            |
| GO:0019748 | secondary metabolic process                                                               |
| GO:0019897 | extrinsic to plasma membrane                                                              |
| GO:0019898 | extrinsic to membrane                                                                     |
| GO:0019932 | second-messenger-mediated signaling                                                       |
| GO:0021700 | developmental maturation                                                                  |
| GO:0022008 | neurogenesis                                                                              |
| GO:0022610 | biological adhesion                                                                       |
| GO:0022612 | gland morphogenesis                                                                       |
| GO:0022804 | active transmembrane transporter activity                                                 |
| GO:0022857 | transmembrane transporter activity                                                        |
| GO:0022891 | substrate-specific transmembrane transporter activity                                     |
| GO:0022892 | substrate-specific transporter activity                                                   |
| GO:0030016 | myofibril                                                                                 |
| GO:0030017 | sarcomere                                                                                 |
| GO:0030029 | actin filament-based process                                                              |
| GO:0030030 | cell morphogenesis                                                                        |
| GO:0030036 | actin cytoskeleton organization and biogenesis                                            |
| GO:0030054 | cell junction                                                                             |

|            |                                                          |
|------------|----------------------------------------------------------|
| GO:0030154 | cell differentiation                                     |
| GO:0030182 | generation of neurons                                    |
| GO:0030239 | myoblast maturation                                      |
| GO:0031012 | extracellular matrix                                     |
| GO:0031032 | actomyosin structure organization and biogenesis         |
| GO:0031175 | generation of neurons                                    |
| GO:0031224 | intrinsic to membrane                                    |
| GO:0031226 | intrinsic to plasma membrane                             |
| GO:0031410 | cytoplasmic vesicle                                      |
| GO:0031667 | response to nutrient levels                              |
| GO:0031982 | vesicle                                                  |
| GO:0031988 | membrane-bound vesicle                                   |
| GO:0032501 | multicellular organismal process                         |
| GO:0032502 | developmental process                                    |
| GO:0032989 | cellular structure morphogenesis                         |
| GO:0032990 | cell part morphogenesis                                  |
| GO:0035107 | appendage morphogenesis                                  |
| GO:0035108 | limb morphogenesis                                       |
| GO:0035109 | imaginal disc-derived limb morphogenesis                 |
| GO:0035110 | leg morphogenesis                                        |
| GO:0035114 | imaginal disc-derived appendage morphogenesis            |
| GO:0035150 | regulation of tube size                                  |
| GO:0035151 | regulation of tube size, open tracheal system            |
| GO:0035152 | regulation of tube architecture, open tracheal system    |
| GO:0035153 | epithelial cell type specification, open tracheal system |
| GO:0035158 | regulation of tube size, open tracheal system            |
| GO:0035159 | regulation of tube size, open tracheal system            |
| GO:0035161 | imaginal disc development                                |
| GO:0035215 | genital disc development                                 |
| GO:0035216 | halter disc development                                  |
| GO:0035218 | leg disc development                                     |
| GO:0035220 | wing disc development                                    |
| GO:0035221 | genital disc development                                 |
| GO:0035222 | wing disc pattern formation                              |
| GO:0035224 | genital disc anterior/posterior pattern formation        |
| GO:0035239 | tube morphogenesis                                       |
| GO:0035264 | multicellular organism growth                            |
| GO:0035272 | exocrine system development                              |
| GO:0035277 | spiracle morphogenesis, open tracheal system             |
| GO:0035285 | appendage morphogenesis                                  |
| GO:0035286 | leg segmentation                                         |
| GO:0035290 | blastoderm segmentation                                  |
| GO:0035292 | blastoderm segmentation                                  |
| GO:0035295 | tube development                                         |
| GO:0040008 | regulation of growth                                     |
| GO:0040014 | regulation of multicellular organism growth              |
| GO:0040018 | positive regulation of multicellular organism growth     |
| GO:0042060 | wound healing                                            |
| GO:0042063 | gliogenesis                                              |
| GO:0042133 | regulation of neurotransmitter levels                    |
| GO:0042136 | neurotransmitter biosynthetic process                    |
| GO:0042330 | taxis                                                    |
| GO:0042398 | amino acid derivative biosynthetic process               |
| GO:0042445 | hormone metabolic process                                |
| GO:0042578 | phosphoric ester hydrolase activity                      |
| GO:0042592 | homeostatic process                                      |
| GO:0042598 | vesicular fraction                                       |
| GO:0042692 | muscle cell differentiation                              |
| GO:0042706 | eye photoreceptor cell fate commitment                   |
| GO:0042742 | defense response to bacterium                            |
| GO:0042802 | identical protein binding                                |
| GO:0042803 | protein homodimerization activity                        |

|            |                                                     |
|------------|-----------------------------------------------------|
| GO:0042834 | peptidoglycan binding                               |
| GO:0042995 | cell projection                                     |
| GO:0043043 | peptide biosynthetic process                        |
| GO:0043062 | extracellular structure organization and biogenesis |
| GO:0043167 | ion binding                                         |
| GO:0043169 | cation binding                                      |
| GO:0043190 | ATP-binding cassette (ABC) transporter complex      |
| GO:0043292 | contractile fiber                                   |
| GO:0043297 | apical junction assembly                            |
| GO:0044255 | cellular lipid metabolic process                    |
| GO:0044271 | nitrogen compound biosynthetic process              |
| GO:0044420 | extracellular matrix                                |
| GO:0044421 | extracellular region                                |
| GO:0044425 | membrane                                            |
| GO:0044449 | contractile fiber                                   |
| GO:0044459 | plasma membrane part                                |
| GO:0045087 | innate immune response                              |
| GO:0045137 | multicellular organismal development                |
| GO:0045165 | cell fate commitment                                |
| GO:0045211 | postsynaptic membrane                               |
| GO:0045214 | myoblast maturation                                 |
| GO:0045216 | intercellular junction assembly and maintenance     |
| GO:0045445 | skeletal muscle fiber development                   |
| GO:0046530 | photoreceptor cell differentiation                  |
| GO:0046546 | development of primary male sexual characteristics  |
| GO:0046552 | photoreceptor cell fate commitment                  |
| GO:0046660 | multicellular organismal development                |
| GO:0046661 | multicellular organismal development                |
| GO:0046872 | metal ion binding                                   |
| GO:0046943 | carboxylic acid transmembrane transporter activity  |
| GO:0046983 | protein dimerization activity                       |
| GO:0048015 | phosphoinositide-mediated signaling                 |
| GO:0048066 | pigmentation during development                     |
| GO:0048190 | wing disc dorsal/ventral pattern formation          |
| GO:0048332 | mesoderm morphogenesis                              |
| GO:0048333 | mesodermal cell differentiation                     |
| GO:0048468 | cell development                                    |
| GO:0048469 | cell development                                    |
| GO:0048511 | rhythmic process                                    |
| GO:0048512 | circadian behavior                                  |
| GO:0048513 | organ development                                   |
| GO:0048546 | digestive tract morphogenesis                       |
| GO:0048547 | gut morphogenesis                                   |
| GO:0048565 | gut development                                     |
| GO:0048567 | ectodermal gut morphogenesis                        |
| GO:0048598 | embryonic morphogenesis                             |
| GO:0048608 | reproductive structure development                  |
| GO:0048627 | skeletal muscle fiber development                   |
| GO:0048628 | myoblast maturation                                 |
| GO:0048645 | organ formation                                     |
| GO:0048646 | anatomical structure development                    |
| GO:0048663 | generation of neurons                               |
| GO:0048664 | generation of neurons                               |
| GO:0048666 | generation of neurons                               |
| GO:0048667 | neuron morphogenesis during differentiation         |
| GO:0048699 | generation of neurons                               |
| GO:0048729 | tissue morphogenesis                                |
| GO:0048731 | system development                                  |
| GO:0048732 | gland development                                   |
| GO:0048736 | appendage development                               |
| GO:0048737 | imaginal disc-derived appendage development         |
| GO:0048741 | skeletal muscle fiber development                   |

|            |                                                       |
|------------|-------------------------------------------------------|
| GO:0048747 | muscle fiber development                              |
| GO:0048806 | genitalia development                                 |
| GO:0048812 | neuron morphogenesis during differentiation           |
| GO:0048856 | anatomical structure development                      |
| GO:0048858 | cell morphogenesis                                    |
| GO:0048859 | formation of anatomical boundary                      |
| GO:0048869 | cellular developmental process                        |
| GO:0050768 | negative regulation of neurogenesis                   |
| GO:0050789 | regulation of biological process                      |
| GO:0050790 | regulation of catalytic activity                      |
| GO:0050793 | regulation of developmental process                   |
| GO:0050808 | synapse organization and biogenesis                   |
| GO:0050830 | defense response to Gram-positive bacterium           |
| GO:0050832 | defense response to fungus                            |
| GO:0050877 | neurological system process                           |
| GO:0050878 | regulation of body fluid levels                       |
| GO:0050896 | response to stimulus                                  |
| GO:0050906 | detection of stimulus during sensory perception       |
| GO:0050908 | detection of light stimulus during visual perception  |
| GO:0050953 | sensory perception of light stimulus                  |
| GO:0050962 | detection of light stimulus during sensory perception |
| GO:0051093 | negative regulation of developmental process          |
| GO:0051146 | striated muscle cell differentiation                  |
| GO:0051179 | localization                                          |
| GO:0051234 | establishment of localization                         |
| GO:0051606 | detection of stimulus                                 |
| GO:0051674 | localization of cell                                  |
| GO:0051704 | multi-organism process                                |
| GO:0051707 | response to other organism                            |
| GO:0055001 | muscle cell development                               |
| GO:0055002 | striated muscle cell development                      |
| GO:0055074 | calcium ion homeostasis                               |
| GO:0060173 | limb development                                      |
| GO:0065007 | biological regulation                                 |
| GO:0065008 | regulation of biological quality                      |
| GO:0065009 | regulation of a molecular function                    |

Table S1B: Gene Ontologies Down-regulated in yw, w1118 DR. All gene ontologies have at least 5 genes in the GO and p value < 0.05.

|            |                                                                                      |
|------------|--------------------------------------------------------------------------------------|
| GO:0000070 | M phase of mitotic cell cycle                                                        |
| GO:0000074 | regulation of progression through cell cycle                                         |
| GO:0000075 | cell cycle checkpoint                                                                |
| GO:0000077 | DNA damage checkpoint                                                                |
| GO:0000082 | interphase of mitotic cell cycle                                                     |
| GO:0000084 | interphase of mitotic cell cycle                                                     |
| GO:0000087 | M phase of mitotic cell cycle                                                        |
| GO:0000119 | DNA-directed RNA polymerase II, holoenzyme                                           |
| GO:0000122 | negative regulation of transcription from RNA polymerase II promoter                 |
| GO:0000226 | microtubule cytoskeleton organization and biogenesis                                 |
| GO:0000228 | nuclear chromosome                                                                   |
| GO:0000278 | mitotic cell cycle                                                                   |
| GO:0000279 | M phase                                                                              |
| GO:0000375 | RNA splicing, via transesterification reactions                                      |
| GO:0000377 | RNA splicing, via transesterification reactions with bulged adenosine as nucleophile |
| GO:0000380 | alternative nuclear mRNA splicing, via spliceosome                                   |
| GO:0000381 | regulation of alternative nuclear mRNA splicing, via spliceosome                     |
| GO:0000398 | nuclear mRNA splicing, via spliceosome                                               |
| GO:0000578 | embryonic axis specification                                                         |
| GO:0000775 | chromosome, pericentric region                                                       |
| GO:0000776 | chromosome, pericentric region                                                       |

|            |                                                                       |
|------------|-----------------------------------------------------------------------|
| GO:0000777 | condensed chromosome, pericentric region                              |
| GO:0000779 | condensed chromosome, pericentric region                              |
| GO:0000785 | chromatin                                                             |
| GO:0000792 | heterochromatin                                                       |
| GO:0000793 | condensed chromosome                                                  |
| GO:0000796 | condensin complex                                                     |
| GO:0000808 | origin recognition complex                                            |
| GO:0000819 | sister chromatid segregation                                          |
| GO:0000910 | cytokinesis                                                           |
| GO:0000940 | condensed chromosome, pericentric region                              |
| GO:0003002 | regionalization                                                       |
| GO:0003676 | nucleic acid binding                                                  |
| GO:0003677 | DNA binding                                                           |
| GO:0003678 | DNA helicase activity                                                 |
| GO:0003682 | chromatin binding                                                     |
| GO:0003702 | RNA polymerase II transcription factor activity                       |
| GO:0003712 | transcription cofactor activity                                       |
| GO:0003713 | transcription coactivator activity                                    |
| GO:0003723 | RNA binding                                                           |
| GO:0003729 | mRNA binding                                                          |
| GO:0003777 | microtubule motor activity                                            |
| GO:0003887 | DNA-directed DNA polymerase activity                                  |
| GO:0004003 | ATP-dependent DNA helicase activity                                   |
| GO:0004004 | ATP-dependent RNA helicase activity                                   |
| GO:0004386 | helicase activity                                                     |
| GO:0004402 | histone acetyltransferase activity                                    |
| GO:0004468 | lysine N-acetyltransferase activity                                   |
| GO:0004518 | nuclease activity                                                     |
| GO:0004519 | endonuclease activity                                                 |
| GO:0004520 | endodeoxyribonuclease activity                                        |
| GO:0004521 | endoribonuclease activity                                             |
| GO:0004529 | exodeoxyribonuclease activity                                         |
| GO:0004536 | deoxyribonuclease activity                                            |
| GO:0004672 | protein kinase activity                                               |
| GO:0004674 | protein serine/threonine kinase activity                              |
| GO:0004693 | cyclin-dependent protein kinase activity                              |
| GO:0004721 | phosphoprotein phosphatase activity                                   |
| GO:0005515 | protein binding                                                       |
| GO:0005622 | intracellular                                                         |
| GO:0005623 | cell                                                                  |
| GO:0005634 | nucleus                                                               |
| GO:0005635 | nuclear envelope                                                      |
| GO:0005654 | nuclear lumen                                                         |
| GO:0005656 | pre-replicative complex                                               |
| GO:0005657 | replication fork                                                      |
| GO:0005658 | alpha DNA polymerase:primase complex                                  |
| GO:0005663 | DNA replication factor C complex                                      |
| GO:0005664 | nuclear origin of replication recognition complex                     |
| GO:0005667 | transcription factor complex                                          |
| GO:0005669 | DNA-directed RNA polymerase II, holoenzyme                            |
| GO:0005678 | chromatin assembly complex                                            |
| GO:0005694 | chromosome                                                            |
| GO:0005700 | polytene chromosome                                                   |
| GO:0005813 | centrosome                                                            |
| GO:0005815 | microtubule organizing center                                         |
| GO:0005819 | spindle                                                               |
| GO:0005828 | kinetochore microtubule                                               |
| GO:0005856 | cytoskeleton                                                          |
| GO:0005871 | kinesin complex                                                       |
| GO:0005874 | microtubule                                                           |
| GO:0005876 | spindle microtubule                                                   |
| GO:0006139 | nucleobase, nucleoside, nucleotide and nucleic acid metabolic process |



|            |                                                                          |
|------------|--------------------------------------------------------------------------|
| GO:0006259 | DNA metabolic process                                                    |
| GO:0006260 | DNA replication                                                          |
| GO:0006261 | DNA-dependent DNA replication                                            |
| GO:0006267 | pre-replicative complex assembly                                         |
| GO:0006270 | DNA-dependent DNA replication                                            |
| GO:0006271 | DNA-dependent DNA replication                                            |
| GO:0006275 | regulation of DNA replication                                            |
| GO:0006277 | DNA amplification                                                        |
| GO:0006281 | DNA repair                                                               |
| GO:0006289 | nucleotide-excision repair                                               |
| GO:0006310 | DNA recombination                                                        |
| GO:0006334 | nucleosome assembly                                                      |
| GO:0006350 | transcription                                                            |
| GO:0006351 | transcription, DNA-dependent                                             |
| GO:0006352 | transcription initiation                                                 |
| GO:0006355 | regulation of transcription, DNA-dependent                               |
| GO:0006357 | regulation of transcription from RNA polymerase II promoter              |
| GO:0006359 | regulation of transcription from RNA polymerase III promoter             |
| GO:0006366 | transcription from RNA polymerase II promoter                            |
| GO:0006367 | transcription initiation from RNA polymerase II promoter                 |
| GO:0006396 | RNA processing                                                           |
| GO:0006397 | mRNA processing                                                          |
| GO:0006464 | protein modification process                                             |
| GO:0006468 | protein amino acid phosphorylation                                       |
| GO:0006470 | protein amino acid dephosphorylation                                     |
| GO:0006606 | protein import into nucleus                                              |
| GO:0006793 | phosphorus metabolic process                                             |
| GO:0006796 | phosphate metabolic process                                              |
| GO:0006950 | response to stress                                                       |
| GO:0006974 | response to DNA damage stimulus                                          |
| GO:0006996 | organelle organization and biogenesis                                    |
| GO:0007010 | cytoskeleton organization and biogenesis                                 |
| GO:0007017 | microtubule-based process                                                |
| GO:0007049 | cell cycle                                                               |
| GO:0007051 | spindle organization and biogenesis                                      |
| GO:0007052 | mitotic spindle organization and biogenesis                              |
| GO:0007059 | chromosome segregation                                                   |
| GO:0007067 | M phase of mitotic cell cycle                                            |
| GO:0007076 | M phase of mitotic cell cycle                                            |
| GO:0007088 | regulation of mitosis                                                    |
| GO:0007093 | mitotic cell cycle checkpoint                                            |
| GO:0007094 | mitotic cell cycle spindle assembly checkpoint                           |
| GO:0007098 | centrosome cycle                                                         |
| GO:0007100 | mitotic centrosome separation                                            |
| GO:0007126 | M phase of meiotic cell cycle                                            |
| GO:0007127 | M phase of meiotic cell cycle                                            |
| GO:0007131 | M phase of meiotic cell cycle                                            |
| GO:0007143 | female meiosis                                                           |
| GO:0007275 | multicellular organismal development                                     |
| GO:0007276 | gamete generation                                                        |
| GO:0007280 | pole cell migration                                                      |
| GO:0007281 | germ cell development                                                    |
| GO:0007292 | female gamete generation                                                 |
| GO:0007293 | germarium-derived egg chamber formation                                  |
| GO:0007294 | germarium-derived oocyte fate determination                              |
| GO:0007304 | ovarian follicle cell development                                        |
| GO:0007306 | ovarian follicle cell development                                        |
| GO:0007307 | ovarian follicle cell development                                        |
| GO:0007311 | maternal determination of dorsal/ventral axis, oocyte, germ-line encoded |
| GO:0007346 | regulation of progression through mitotic cell cycle                     |
| GO:0007348 | regulation of progression through embryonic mitotic cell cycle           |
| GO:0007349 | cellularization                                                          |

|            |                                                                 |
|------------|-----------------------------------------------------------------|
| GO:0007351 | blastoderm segmentation                                         |
| GO:0007389 | multicellular organismal development                            |
| GO:0007568 | aging                                                           |
| GO:0008026 | ATP-dependent helicase activity                                 |
| GO:0008063 | Toll signaling pathway                                          |
| GO:0008094 | DNA-dependent ATPase activity                                   |
| GO:0008134 | transcription factor binding                                    |
| GO:0008156 | negative regulation of DNA replication                          |
| GO:0008168 | methyltransferase activity                                      |
| GO:0008186 | RNA-dependent ATPase activity                                   |
| GO:0008276 | protein methyltransferase activity                              |
| GO:0008283 | cell proliferation                                              |
| GO:0008296 | 3'-5'-exodeoxyribonuclease activity                             |
| GO:0008340 | multicellular organismal aging                                  |
| GO:0008354 | germ cell migration                                             |
| GO:0008356 | asymmetric cell division                                        |
| GO:0008375 | acetylglucosaminyltransferase activity                          |
| GO:0008380 | RNA splicing                                                    |
| GO:0008574 | plus-end-directed microtubule motor activity                    |
| GO:0008595 | blastoderm segmentation                                         |
| GO:0009653 | anatomical structure development                                |
| GO:0009719 | response to endogenous stimulus                                 |
| GO:0009790 | embryonic development                                           |
| GO:0009794 | regulation of progression through embryonic mitotic cell cycle  |
| GO:0009798 | axis specification                                              |
| GO:0009880 | embryonic development                                           |
| GO:0009892 | negative regulation of metabolic process                        |
| GO:0009893 | positive regulation of metabolic process                        |
| GO:0009948 | anterior/posterior axis specification                           |
| GO:0009949 | anterior/posterior axis specification                           |
| GO:0009950 | dorsal/ventral axis specification                               |
| GO:0009951 | dorsal/ventral axis specification                               |
| GO:0009952 | anterior/posterior pattern formation                            |
| GO:0009953 | dorsal/ventral pattern formation                                |
| GO:0009994 | oocyte differentiation                                          |
| GO:0010259 | multicellular organismal aging                                  |
| GO:0010467 | gene expression                                                 |
| GO:0010468 | regulation of gene expression                                   |
| GO:0015630 | microtubule cytoskeleton                                        |
| GO:0016015 | morphogen activity                                              |
| GO:0016043 | cellular component organization and biogenesis                  |
| GO:0016070 | RNA metabolic process                                           |
| GO:0016071 | mRNA metabolic process                                          |
| GO:0016251 | general RNA polymerase II transcription factor activity         |
| GO:0016301 | kinase activity                                                 |
| GO:0016310 | phosphorylation                                                 |
| GO:0016311 | dephosphorylation                                               |
| GO:0016321 | female meiosis                                                  |
| GO:0016455 | RNA polymerase II transcription mediator activity               |
| GO:0016481 | negative regulation of transcription                            |
| GO:0016538 | cyclin-dependent protein kinase regulator activity              |
| GO:0016563 | transcription activator activity                                |
| GO:0016564 | transcription repressor activity                                |
| GO:0016568 | chromatin modification                                          |
| GO:0016569 | covalent chromatin modification                                 |
| GO:0016570 | histone modification                                            |
| GO:0016572 | histone phosphorylation                                         |
| GO:0016591 | DNA-directed RNA polymerase II, holoenzyme                      |
| GO:0016740 | transferase activity                                            |
| GO:0016772 | transferase activity, transferring phosphorus-containing groups |
| GO:0016773 | phosphotransferase activity, alcohol group as acceptor          |
| GO:0016779 | nucleotidyltransferase activity                                 |

|            |                                                                                     |
|------------|-------------------------------------------------------------------------------------|
| GO:0016788 | hydrolase activity, acting on ester bonds                                           |
| GO:0016791 | phosphoric monoester hydrolase activity                                             |
| GO:0016799 | hydrolase activity, hydrolyzing N-glycosyl compounds                                |
| GO:0016895 | exodeoxyribonuclease activity, producing 5'-phosphomonoesters                       |
| GO:0017038 | protein import                                                                      |
| GO:0019104 | DNA N-glycosylase activity                                                          |
| GO:0019219 | regulation of nucleobase, nucleoside, nucleotide and nucleic acid metabolic process |
| GO:0019220 | regulation of phosphate metabolic process                                           |
| GO:0019222 | regulation of metabolic process                                                     |
| GO:0019953 | sexual reproduction                                                                 |
| GO:0022402 | cell cycle                                                                          |
| GO:0022403 | cell cycle phase                                                                    |
| GO:0022607 | cellular component assembly                                                         |
| GO:0022616 | DNA strand elongation                                                               |
| GO:0030154 | cell differentiation                                                                |
| GO:0030261 | chromosome condensation                                                             |
| GO:0030496 | midbody                                                                             |
| GO:0030703 | eggshell formation                                                                  |
| GO:0030706 | germarium-derived oocyte differentiation                                            |
| GO:0030707 | ovarian follicle cell development                                                   |
| GO:0030716 | oocyte fate determination                                                           |
| GO:0030717 | karyosome formation                                                                 |
| GO:0030720 | germarium-derived egg chamber formation                                             |
| GO:0030727 | germarium-derived female germ-line cyst formation                                   |
| GO:0030894 | replication fork                                                                    |
| GO:0031023 | microtubule organizing center organization and biogenesis                           |
| GO:0031323 | regulation of cellular metabolic process                                            |
| GO:0031324 | negative regulation of cellular metabolic process                                   |
| GO:0031325 | positive regulation of cellular metabolic process                                   |
| GO:0031519 | PcG protein complex                                                                 |
| GO:0031523 | Myb complex                                                                         |
| GO:0031570 | DNA integrity checkpoint                                                            |
| GO:0031577 | spindle checkpoint                                                                  |
| GO:0031965 | nuclear envelope                                                                    |
| GO:0031974 | membrane-enclosed lumen                                                             |
| GO:0031981 | nuclear lumen                                                                       |
| GO:0032502 | developmental process                                                               |
| GO:0032774 | RNA biosynthetic process                                                            |
| GO:0032837 | distributive segregation                                                            |
| GO:0032991 | macromolecular complex                                                              |
| GO:0033036 | macromolecule localization                                                          |
| GO:0033301 | cell cycle comprising mitosis without cytokinesis                                   |
| GO:0035058 | sensory cilium biogenesis                                                           |
| GO:0035098 | ESC/E(Z) complex                                                                    |
| GO:0035102 | PRC1 complex                                                                        |
| GO:0035186 | syncytial blastoderm mitotic cell cycle                                             |
| GO:0035303 | regulation of dephosphorylation                                                     |
| GO:0035304 | regulation of protein amino acid dephosphorylation                                  |
| GO:0042023 | DNA endoreduplication                                                               |
| GO:0042054 | histone methyltransferase activity                                                  |
| GO:0042384 | cilium biogenesis                                                                   |
| GO:0042575 | DNA polymerase complex                                                              |
| GO:0042578 | phosphoric ester hydrolase activity                                                 |
| GO:0042770 | DNA damage response, signal transduction                                            |
| GO:0043138 | 3'-5' DNA helicase activity                                                         |
| GO:0043170 | macromolecule metabolic process                                                     |
| GO:0043189 | H4/H2A histone acetyltransferase complex                                            |
| GO:0043226 | organelle                                                                           |
| GO:0043227 | membrane-bound organelle                                                            |
| GO:0043228 | non-membrane-bound organelle                                                        |
| GO:0043229 | intracellular organelle                                                             |
| GO:0043231 | intracellular membrane-bound organelle                                              |

|            |                                                                                              |
|------------|----------------------------------------------------------------------------------------------|
| GO:0043232 | intracellular non-membrane-bound organelle                                                   |
| GO:0043233 | organelle lumen                                                                              |
| GO:0043234 | protein complex                                                                              |
| GO:0043283 | biopolymer metabolic process                                                                 |
| GO:0043412 | biopolymer modification                                                                      |
| GO:0043414 | biopolymer methylation                                                                       |
| GO:0043596 | nuclear replication fork                                                                     |
| GO:0043601 | nuclear replication fork                                                                     |
| GO:0043623 | cellular protein complex assembly                                                            |
| GO:0043687 | post-translational protein modification                                                      |
| GO:0044237 | cellular metabolic process                                                                   |
| GO:0044238 | primary metabolic process                                                                    |
| GO:0044422 | organelle                                                                                    |
| GO:0044424 | intracellular                                                                                |
| GO:0044427 | chromosome                                                                                   |
| GO:0044428 | nucleus                                                                                      |
| GO:0044430 | cytoskeleton                                                                                 |
| GO:0044446 | intracellular organelle                                                                      |
| GO:0044450 | microtubule organizing center                                                                |
| GO:0044451 | nuclear lumen                                                                                |
| GO:0044453 | nuclear envelope                                                                             |
| GO:0044454 | nuclear chromosome                                                                           |
| GO:0044464 | cell                                                                                         |
| GO:0045132 | M phase of meiotic cell cycle                                                                |
| GO:0045143 | M phase of meiotic cell cycle                                                                |
| GO:0045448 | mitotic cell cycle, embryonic                                                                |
| GO:0045449 | regulation of transcription                                                                  |
| GO:0045786 | negative regulation of progression through cell cycle                                        |
| GO:0045787 | positive regulation of progression through cell cycle                                        |
| GO:0045892 | negative regulation of transcription, DNA-dependent                                          |
| GO:0045893 | positive regulation of transcription, DNA-dependent                                          |
| GO:0045931 | positive regulation of progression through mitotic cell cycle                                |
| GO:0045934 | negative regulation of nucleobase, nucleoside, nucleotide and nucleic acid metabolic process |
| GO:0045935 | positive regulation of nucleobase, nucleoside, nucleotide and nucleic acid metabolic process |
| GO:0045941 | positive regulation of transcription                                                         |
| GO:0046823 | negative regulation of nucleocytoplasmic transport                                           |
| GO:0046974 | histone lysine N-methyltransferase activity (H3-K9 specific)                                 |
| GO:0046976 | histone lysine N-methyltransferase activity (H3-K27 specific)                                |
| GO:0048024 | regulation of nuclear mRNA splicing, via spliceosome                                         |
| GO:0048134 | germ cell development                                                                        |
| GO:0048135 | female germ-line cyst formation                                                              |
| GO:0048468 | cell development                                                                             |
| GO:0048477 | oogenesis                                                                                    |
| GO:0048518 | positive regulation of biological process                                                    |
| GO:0048519 | negative regulation of biological process                                                    |
| GO:0048522 | positive regulation of cellular process                                                      |
| GO:0048523 | negative regulation of cellular process                                                      |
| GO:0048646 | anatomical structure development                                                             |
| GO:0048856 | anatomical structure development                                                             |
| GO:0048869 | cellular developmental process                                                               |
| GO:0050000 | chromosome localization                                                                      |
| GO:0050684 | regulation of mRNA processing                                                                |
| GO:0050789 | regulation of biological process                                                             |
| GO:0050794 | regulation of cellular process                                                               |
| GO:0051051 | negative regulation of transport                                                             |
| GO:0051052 | regulation of DNA metabolic process                                                          |
| GO:0051053 | negative regulation of DNA metabolic process                                                 |
| GO:0051170 | nuclear import                                                                               |
| GO:0051174 | regulation of phosphorus metabolic process                                                   |
| GO:0051224 | negative regulation of protein transport                                                     |
| GO:0051225 | spindle assembly                                                                             |
| GO:0051246 | regulation of protein metabolic process                                                      |

|            |                                                  |
|------------|--------------------------------------------------|
| GO:0051248 | negative regulation of protein metabolic process |
| GO:0051252 | regulation of RNA metabolic process              |
| GO:0051276 | chromosome organization and biogenesis           |
| GO:0051297 | centrosome organization and biogenesis           |
| GO:0051299 | centrosome cycle                                 |
| GO:0051301 | cell division                                    |
| GO:0051303 | establishment of chromosome localization         |
| GO:0051320 | interphase                                       |
| GO:0051321 | meiotic cell cycle                               |
| GO:0051322 | anaphase                                         |
| GO:0051325 | interphase                                       |
| GO:0051327 | M phase of meiotic cell cycle                    |
| GO:0051329 | interphase of mitotic cell cycle                 |
| GO:0051726 | regulation of cell cycle                         |
| GO:0065001 | specification of axis polarity                   |
| GO:0065003 | macromolecular complex assembly                  |
| GO:0065004 | protein-DNA complex assembly                     |
| GO:0065007 | biological regulation                            |

Table S1C: Gene Ontologies Up-regulated in Canton-S DR. All gene ontologies have at least 5 genes in the GO and p value < 0.05.

|            |                                                                 |
|------------|-----------------------------------------------------------------|
| GO:0000038 | very-long-chain fatty acid metabolic process                    |
| GO:0000267 | cell fraction                                                   |
| GO:0000902 | cell morphogenesis                                              |
| GO:0000904 | cell development                                                |
| GO:0001505 | regulation of neurotransmitter levels                           |
| GO:0001736 | establishment of planar polarity                                |
| GO:0001738 | morphogenesis of a polarized epithelium                         |
| GO:0001751 | compound eye photoreceptor cell differentiation                 |
| GO:0001752 | compound eye photoreceptor fate commitment                      |
| GO:0001754 | eye photoreceptor cell differentiation                          |
| GO:0001763 | morphogenesis of a branching structure                          |
| GO:0002165 | instar larval or pupal development                              |
| GO:0002376 | immune system process                                           |
| GO:0003008 | system process                                                  |
| GO:0003779 | actin binding                                                   |
| GO:0003993 | acid phosphatase activity                                       |
| GO:0004035 | alkaline phosphatase activity                                   |
| GO:0004046 | aminoacylase activity                                           |
| GO:0004175 | endopeptidase activity                                          |
| GO:0004197 | cysteine-type endopeptidase activity                            |
| GO:0004263 | chymotrypsin activity                                           |
| GO:0004312 | fatty-acid synthase activity                                    |
| GO:0004568 | chitinase activity                                              |
| GO:0004672 | protein kinase activity                                         |
| GO:0004674 | protein serine/threonine kinase activity                        |
| GO:0004723 | calcium-dependent protein serine/threonine phosphatase activity |
| GO:0004857 | enzyme inhibitor activity                                       |
| GO:0004871 | signal transducer activity                                      |
| GO:0004872 | receptor activity                                               |
| GO:0004888 | transmembrane receptor activity                                 |
| GO:0005102 | receptor binding                                                |
| GO:0005160 | transforming growth factor beta receptor binding                |
| GO:0005184 | neuropeptide hormone activity                                   |
| GO:0005200 | structural constituent of cytoskeleton                          |
| GO:0005275 | amine transmembrane transporter activity                        |
| GO:0005283 | sodium:amino acid symporter activity                            |
| GO:0005316 | high affinity inorganic phosphate:sodium symporter activity     |
| GO:0005328 | neurotransmitter:sodium symporter activity                      |
| GO:0005342 | organic acid transmembrane transporter activity                 |

|            |                                                                                   |
|------------|-----------------------------------------------------------------------------------|
| GO:0005388 | calcium-transporting ATPase activity                                              |
| GO:0005416 | cation:amino acid symporter activity                                              |
| GO:0005436 | sodium:phosphate symporter activity                                               |
| GO:0005509 | calcium ion binding                                                               |
| GO:0005515 | protein binding                                                                   |
| GO:0005516 | calmodulin binding                                                                |
| GO:0005578 | proteinaceous extracellular matrix                                                |
| GO:0005604 | basement membrane                                                                 |
| GO:0005615 | extracellular space                                                               |
| GO:0005624 | membrane fraction                                                                 |
| GO:0005792 | microsome                                                                         |
| GO:0005856 | cytoskeleton                                                                      |
| GO:0005859 | muscle myosin complex                                                             |
| GO:0005865 | sarcomere                                                                         |
| GO:0005886 | plasma membrane                                                                   |
| GO:0005887 | integral to plasma membrane                                                       |
| GO:0006468 | protein amino acid phosphorylation                                                |
| GO:0006536 | glutamate metabolic process                                                       |
| GO:0006568 | tryptophan metabolic process                                                      |
| GO:0006633 | fatty acid biosynthetic process                                                   |
| GO:0006793 | phosphorus metabolic process                                                      |
| GO:0006796 | phosphate metabolic process                                                       |
| GO:0006810 | transport                                                                         |
| GO:0006811 | ion transport                                                                     |
| GO:0006812 | cation transport                                                                  |
| GO:0006816 | calcium ion transport                                                             |
| GO:0006817 | phosphate transport                                                               |
| GO:0006820 | anion transport                                                                   |
| GO:0006874 | cellular calcium ion homeostasis                                                  |
| GO:0006928 | cell motility                                                                     |
| GO:0006952 | defense response                                                                  |
| GO:0006955 | immune response                                                                   |
| GO:0007154 | cell communication                                                                |
| GO:0007155 | cell adhesion                                                                     |
| GO:0007164 | establishment of tissue polarity                                                  |
| GO:0007165 | signal transduction                                                               |
| GO:0007166 | cell surface receptor linked signal transduction                                  |
| GO:0007167 | enzyme linked receptor protein signaling pathway                                  |
| GO:0007169 | transmembrane receptor protein tyrosine kinase signaling pathway                  |
| GO:0007186 | G-protein coupled receptor protein signaling pathway                              |
| GO:0007200 | G-protein signaling, coupled to IP3 second messenger (phospholipase C activating) |
| GO:0007218 | neuropeptide signaling pathway                                                    |
| GO:0007242 | intracellular signaling cascade                                                   |
| GO:0007267 | cell-cell signaling                                                               |
| GO:0007268 | synaptic transmission                                                             |
| GO:0007275 | multicellular organismal development                                              |
| GO:0007392 | dorsal closure                                                                    |
| GO:0007399 | nervous system development                                                        |
| GO:0007409 | axonogenesis                                                                      |
| GO:0007411 | axonogenesis                                                                      |
| GO:0007416 | synaptogenesis                                                                    |
| GO:0007424 | open tracheal system development                                                  |
| GO:0007431 | salivary gland development                                                        |
| GO:0007432 | salivary gland boundary specification                                             |
| GO:0007439 | ectodermal gut development                                                        |
| GO:0007447 | imaginal disc development                                                         |
| GO:0007458 | eye-antennal disc morphogenesis                                                   |
| GO:0007472 | wing disc morphogenesis                                                           |
| GO:0007473 | wing disc proximal/distal pattern formation                                       |
| GO:0007476 | imaginal disc-derived wing morphogenesis                                          |
| GO:0007478 | leg disc morphogenesis                                                            |
| GO:0007498 | mesoderm development                                                              |

|            |                                                                    |
|------------|--------------------------------------------------------------------|
| GO:0007507 | heart development                                                  |
| GO:0007517 | muscle development                                                 |
| GO:0007519 | skeletal muscle development                                        |
| GO:0007525 | somatic muscle development                                         |
| GO:0007528 | skeletal muscle fiber development                                  |
| GO:0007548 | sex differentiation                                                |
| GO:0007559 | histolysis                                                         |
| GO:0007601 | visual perception                                                  |
| GO:0007602 | phototransduction                                                  |
| GO:0007604 | phototransduction, UV                                              |
| GO:0007623 | circadian rhythm                                                   |
| GO:0007626 | locomotory behavior                                                |
| GO:0008020 | G-protein coupled photoreceptor activity                           |
| GO:0008021 | synaptic vesicle                                                   |
| GO:0008083 | growth factor activity                                             |
| GO:0008084 | imaginal disc growth factor activity                               |
| GO:0008092 | cytoskeletal protein binding                                       |
| GO:0008253 | 5'-nucleotidase activity                                           |
| GO:0008271 | secondary active sulfate transmembrane transporter activity        |
| GO:0008277 | regulation of G-protein coupled receptor protein signaling pathway |
| GO:0008289 | lipid binding                                                      |
| GO:0008324 | cation transmembrane transporter activity                          |
| GO:0008360 | regulation of cell shape                                           |
| GO:0008367 | bacterial binding                                                  |
| GO:0008368 | Gram-negative bacterial binding                                    |
| GO:0008507 | sodium:iodide symporter activity                                   |
| GO:0008509 | anion transmembrane transporter activity                           |
| GO:0008514 | organic anion transmembrane transporter activity                   |
| GO:0008523 | sodium-dependent multivitamin transmembrane transporter activity   |
| GO:0008543 | fibroblast growth factor receptor signaling pathway                |
| GO:0008586 | imaginal disc-derived wing morphogenesis                           |
| GO:0008610 | lipid biosynthetic process                                         |
| GO:0009055 | electron carrier activity                                          |
| GO:0009064 | glutamine family amino acid metabolic process                      |
| GO:0009065 | glutamine family amino acid catabolic process                      |
| GO:0009309 | amine biosynthetic process                                         |
| GO:0009314 | response to radiation                                              |
| GO:0009411 | response to UV                                                     |
| GO:0009416 | response to light stimulus                                         |
| GO:0009581 | detection of external stimulus                                     |
| GO:0009582 | detection of abiotic stimulus                                      |
| GO:0009583 | detection of light stimulus                                        |
| GO:0009584 | detection of visible light                                         |
| GO:0009586 | rhodopsin mediated phototransduction                               |
| GO:0009589 | detection of UV                                                    |
| GO:0009595 | detection of biotic stimulus                                       |
| GO:0009605 | response to external stimulus                                      |
| GO:0009607 | response to biotic stimulus                                        |
| GO:0009617 | response to bacterium                                              |
| GO:0009628 | response to abiotic stimulus                                       |
| GO:0009791 | multicellular organismal development                               |
| GO:0009881 | photoreceptor activity                                             |
| GO:0009888 | organ development                                                  |
| GO:0014706 | striated muscle development                                        |
| GO:0015075 | ion transmembrane transporter activity                             |
| GO:0015085 | calcium ion transmembrane transporter activity                     |
| GO:0015101 | organic cation transmembrane transporter activity                  |
| GO:0015103 | inorganic anion transmembrane transporter activity                 |
| GO:0015114 | phosphate transmembrane transporter activity                       |
| GO:0015116 | sulfate transmembrane transporter activity                         |
| GO:0015171 | amino acid transmembrane transporter activity                      |
| GO:0015179 | L-amino acid transmembrane transporter activity                    |

|            |                                                                                                |
|------------|------------------------------------------------------------------------------------------------|
| GO:0015291 | secondary active transmembrane transporter activity                                            |
| GO:0015293 | symporter activity                                                                             |
| GO:0015294 | solute:cation symporter activity                                                               |
| GO:0015296 | anion:cation symporter activity                                                                |
| GO:0015370 | solute:sodium symporter activity                                                               |
| GO:0015373 | monovalent anion:sodium symporter activity                                                     |
| GO:0015381 | high affinity sulfate transmembrane transporter activity                                       |
| GO:0015399 | primary active transmembrane transporter activity                                              |
| GO:0015405 | P-P-bond-hydrolysis-driven transmembrane transporter activity                                  |
| GO:0015629 | actin cytoskeleton                                                                             |
| GO:0015674 | di-, tri-valent inorganic cation transport                                                     |
| GO:0015698 | inorganic anion transport                                                                      |
| GO:0015711 | organic anion transport                                                                        |
| GO:0016020 | membrane                                                                                       |
| GO:0016021 | integral to membrane                                                                           |
| GO:0016023 | cytoplasmic membrane-bound vesicle                                                             |
| GO:0016027 | rhabdomere                                                                                     |
| GO:0016028 | rhabdomere                                                                                     |
| GO:0016045 | detection of bacterium                                                                         |
| GO:0016053 | organic acid biosynthetic process                                                              |
| GO:0016056 | rhodopsin mediated signaling                                                                   |
| GO:0016059 | deactivation of rhodopsin mediated signaling                                                   |
| GO:0016271 | tissue death                                                                                   |
| GO:0016301 | kinase activity                                                                                |
| GO:0016310 | phosphorylation                                                                                |
| GO:0016459 | actin cytoskeleton                                                                             |
| GO:0016460 | myosin II complex                                                                              |
| GO:0016477 | cell migration                                                                                 |
| GO:0016511 | endothelin-converting enzyme activity                                                          |
| GO:0016772 | transferase activity, transferring phosphorus-containing groups                                |
| GO:0016773 | phosphotransferase activity, alcohol group as acceptor                                         |
| GO:0016787 | hydrolase activity                                                                             |
| GO:0016788 | hydrolase activity, acting on ester bonds                                                      |
| GO:0016791 | phosphoric monoester hydrolase activity                                                        |
| GO:0016810 | hydrolase activity, acting on carbon-nitrogen (but not peptide) bonds                          |
| GO:0016811 | hydrolase activity, acting on carbon-nitrogen (but not peptide) bonds, in linear amides        |
| GO:0016820 | hydrolase activity, acting on acid anhydrides, catalyzing transmembrane movement of substances |
| GO:0016830 | carbon-carbon lyase activity                                                                   |
| GO:0016831 | carboxy-lyase activity                                                                         |
| GO:0019201 | nucleotide kinase activity                                                                     |
| GO:0019226 | transmission of nerve impulse                                                                  |
| GO:0019722 | calcium-mediated signaling                                                                     |
| GO:0019725 | cellular homeostasis                                                                           |
| GO:0019897 | extrinsic to plasma membrane                                                                   |
| GO:0019898 | extrinsic to membrane                                                                          |
| GO:0019932 | second-messenger-mediated signaling                                                            |
| GO:0019992 | diacylglycerol binding                                                                         |
| GO:0021700 | developmental maturation                                                                       |
| GO:0022008 | neurogenesis                                                                                   |
| GO:0022410 | circadian sleep/wake cycle                                                                     |
| GO:0022603 | regulation of anatomical structure morphogenesis                                               |
| GO:0022604 | regulation of cell morphogenesis                                                               |
| GO:0022610 | biological adhesion                                                                            |
| GO:0022804 | active transmembrane transporter activity                                                      |
| GO:0022857 | transmembrane transporter activity                                                             |
| GO:0022891 | substrate-specific transmembrane transporter activity                                          |
| GO:0022892 | substrate-specific transporter activity                                                        |
| GO:0030001 | metal ion transport                                                                            |
| GO:0030016 | myofibril                                                                                      |
| GO:0030017 | sarcomere                                                                                      |
| GO:0030029 | actin filament-based process                                                                   |
| GO:0030030 | cell morphogenesis                                                                             |



|            |                                                                  |
|------------|------------------------------------------------------------------|
| GO:0030036 | actin cytoskeleton organization and biogenesis                   |
| GO:0030136 | clathrin-coated vesicle                                          |
| GO:0030154 | cell differentiation                                             |
| GO:0030182 | generation of neurons                                            |
| GO:0030239 | myoblast maturation                                              |
| GO:0030414 | protease inhibitor activity                                      |
| GO:0031012 | extracellular matrix                                             |
| GO:0031175 | generation of neurons                                            |
| GO:0031224 | intrinsic to membrane                                            |
| GO:0031226 | intrinsic to plasma membrane                                     |
| GO:0031410 | cytoplasmic vesicle                                              |
| GO:0031982 | vesicle                                                          |
| GO:0031988 | membrane-bound vesicle                                           |
| GO:0032501 | multicellular organismal process                                 |
| GO:0032989 | cellular structure morphogenesis                                 |
| GO:0032990 | cell part morphogenesis                                          |
| GO:0035026 | leading edge cell differentiation                                |
| GO:0035070 | salivary gland development                                       |
| GO:0035071 | salivary gland cell autophagic cell death                        |
| GO:0035107 | appendage morphogenesis                                          |
| GO:0035114 | imaginal disc-derived appendage morphogenesis                    |
| GO:0035146 | branching morphogenesis of a tube                                |
| GO:0035147 | branch fusion, open tracheal system                              |
| GO:0035152 | regulation of tube architecture, open tracheal system            |
| GO:0035153 | epithelial cell type specification, open tracheal system         |
| GO:0035154 | terminal cell fate specification, open tracheal system           |
| GO:0035215 | genital disc development                                         |
| GO:0035216 | haltere disc development                                         |
| GO:0035218 | leg disc development                                             |
| GO:0035220 | wing disc development                                            |
| GO:0035222 | wing disc pattern formation                                      |
| GO:0035272 | exocrine system development                                      |
| GO:0035277 | spiracle morphogenesis, open tracheal system                     |
| GO:0042044 | fluid transport                                                  |
| GO:0042133 | regulation of neurotransmitter levels                            |
| GO:0042136 | neurotransmitter biosynthetic process                            |
| GO:0042330 | taxis                                                            |
| GO:0042398 | amino acid derivative biosynthetic process                       |
| GO:0042445 | hormone metabolic process                                        |
| GO:0042446 | hormone biosynthetic process                                     |
| GO:0042461 | photoreceptor cell development                                   |
| GO:0042578 | phosphoric ester hydrolase activity                              |
| GO:0042592 | homeostatic process                                              |
| GO:0042598 | vesicular fraction                                               |
| GO:0042626 | ATPase activity, coupled to transmembrane movement of substances |
| GO:0042692 | muscle cell differentiation                                      |
| GO:0042706 | eye photoreceptor cell fate commitment                           |
| GO:0042742 | defense response to bacterium                                    |
| GO:0042745 | circadian sleep/wake cycle                                       |
| GO:0042749 | regulation of circadian sleep/wake cycle                         |
| GO:0042752 | regulation of circadian rhythm                                   |
| GO:0042995 | cell projection                                                  |
| GO:0043167 | ion binding                                                      |
| GO:0043169 | cation binding                                                   |
| GO:0043190 | ATP-binding cassette (ABC) transporter complex                   |
| GO:0043292 | contractile fiber                                                |
| GO:0043492 | ATPase activity, coupled to movement of substances               |
| GO:0043687 | post-translational protein modification                          |
| GO:0044271 | nitrogen compound biosynthetic process                           |
| GO:0044420 | extracellular matrix                                             |
| GO:0044421 | extracellular region                                             |
| GO:0044425 | membrane                                                         |

|            |                                                                                              |
|------------|----------------------------------------------------------------------------------------------|
| GO:0044449 | contractile fiber                                                                            |
| GO:0044456 | synapse                                                                                      |
| GO:0044459 | plasma membrane part                                                                         |
| GO:0045137 | multicellular organismal development                                                         |
| GO:0045165 | cell fate commitment                                                                         |
| GO:0045187 | regulation of circadian sleep/wake cycle, sleep                                              |
| GO:0045211 | postsynaptic membrane                                                                        |
| GO:0045445 | skeletal muscle fiber development                                                            |
| GO:0045893 | positive regulation of transcription, DNA-dependent                                          |
| GO:0045935 | positive regulation of nucleobase, nucleoside, nucleotide and nucleic acid metabolic process |
| GO:0045941 | positive regulation of transcription                                                         |
| GO:0046394 | carboxylic acid biosynthetic process                                                         |
| GO:0046530 | photoreceptor cell differentiation                                                           |
| GO:0046552 | photoreceptor cell fate commitment                                                           |
| GO:0046661 | multicellular organismal development                                                         |
| GO:0046663 | dorsal closure, leading edge cell differentiation                                            |
| GO:0046872 | metal ion binding                                                                            |
| GO:0046943 | carboxylic acid transmembrane transporter activity                                           |
| GO:0046983 | protein dimerization activity                                                                |
| GO:0048015 | phosphoinositide-mediated signaling                                                          |
| GO:0048102 | autophagic cell death                                                                        |
| GO:0048468 | cell development                                                                             |
| GO:0048469 | cell development                                                                             |
| GO:0048511 | rhythmic process                                                                             |
| GO:0048512 | circadian behavior                                                                           |
| GO:0048513 | organ development                                                                            |
| GO:0048565 | gut development                                                                              |
| GO:0048567 | ectodermal gut morphogenesis                                                                 |
| GO:0048627 | skeletal muscle fiber development                                                            |
| GO:0048628 | myoblast maturation                                                                          |
| GO:0048666 | generation of neurons                                                                        |
| GO:0048667 | neuron morphogenesis during differentiation                                                  |
| GO:0048699 | generation of neurons                                                                        |
| GO:0048731 | system development                                                                           |
| GO:0048732 | gland development                                                                            |
| GO:0048736 | appendage development                                                                        |
| GO:0048737 | imaginal disc-derived appendage development                                                  |
| GO:0048741 | skeletal muscle fiber development                                                            |
| GO:0048747 | muscle fiber development                                                                     |
| GO:0048754 | branching morphogenesis of a tube                                                            |
| GO:0048812 | neuron morphogenesis during differentiation                                                  |
| GO:0048856 | anatomical structure development                                                             |
| GO:0048858 | cell morphogenesis                                                                           |
| GO:0048869 | cellular developmental process                                                               |
| GO:0050789 | regulation of biological process                                                             |
| GO:0050790 | regulation of catalytic activity                                                             |
| GO:0050793 | regulation of developmental process                                                          |
| GO:0050802 | circadian sleep/wake cycle, sleep                                                            |
| GO:0050808 | synapse organization and biogenesis                                                          |
| GO:0050877 | neurological system process                                                                  |
| GO:0050896 | response to stimulus                                                                         |
| GO:0050906 | detection of stimulus during sensory perception                                              |
| GO:0050908 | detection of light stimulus during visual perception                                         |
| GO:0050953 | sensory perception of light stimulus                                                         |
| GO:0050962 | detection of light stimulus during sensory perception                                        |
| GO:0051146 | striated muscle cell differentiation                                                         |
| GO:0051179 | localization                                                                                 |
| GO:0051180 | vitamin transport                                                                            |
| GO:0051234 | establishment of localization                                                                |
| GO:0051235 | localization                                                                                 |
| GO:0051336 | regulation of hydrolase activity                                                             |
| GO:0051606 | detection of stimulus                                                                        |

|            |                                    |
|------------|------------------------------------|
| GO:0051674 | localization of cell               |
| GO:0051704 | multi-organism process             |
| GO:0051707 | response to other organism         |
| GO:0055001 | muscle cell development            |
| GO:0055002 | striated muscle cell development   |
| GO:0055074 | calcium ion homeostasis            |
| GO:0060089 | molecular transducer activity      |
| GO:0065007 | biological regulation              |
| GO:0065008 | regulation of biological quality   |
| GO:0065009 | regulation of a molecular function |

Table SID: Gene Ontologies Down-regulated in Canton-S DR. All gene ontologies have at least 5 genes in the GO and p value < 0.05.

|            |                                                                                      |
|------------|--------------------------------------------------------------------------------------|
| GO:0000070 | M phase of mitotic cell cycle                                                        |
| GO:0000074 | regulation of progression through cell cycle                                         |
| GO:0000075 | cell cycle checkpoint                                                                |
| GO:0000079 | regulation of cyclin-dependent protein kinase activity                               |
| GO:0000082 | interphase of mitotic cell cycle                                                     |
| GO:0000084 | interphase of mitotic cell cycle                                                     |
| GO:0000087 | M phase of mitotic cell cycle                                                        |
| GO:0000119 | DNA-directed RNA polymerase II, holoenzyme                                           |
| GO:0000122 | negative regulation of transcription from RNA polymerase II promoter                 |
| GO:0000152 | nuclear ubiquitin ligase complex                                                     |
| GO:0000226 | microtubule cytoskeleton organization and biogenesis                                 |
| GO:0000228 | nuclear chromosome                                                                   |
| GO:0000278 | mitotic cell cycle                                                                   |
| GO:0000279 | M phase                                                                              |
| GO:0000280 | nuclear division                                                                     |
| GO:0000375 | RNA splicing, via transesterification reactions                                      |
| GO:0000377 | RNA splicing, via transesterification reactions with bulged adenosine as nucleophile |
| GO:0000380 | alternative nuclear mRNA splicing, via spliceosome                                   |
| GO:0000381 | regulation of alternative nuclear mRNA splicing, via spliceosome                     |
| GO:0000398 | nuclear mRNA splicing, via spliceosome                                               |
| GO:0000775 | chromosome, pericentric region                                                       |
| GO:0000776 | chromosome, pericentric region                                                       |
| GO:0000777 | condensed chromosome, pericentric region                                             |
| GO:0000779 | condensed chromosome, pericentric region                                             |
| GO:0000785 | chromatin                                                                            |
| GO:0000792 | heterochromatin                                                                      |
| GO:0000793 | condensed chromosome                                                                 |
| GO:0000808 | origin recognition complex                                                           |
| GO:0000819 | sister chromatid segregation                                                         |
| GO:0000902 | cell morphogenesis                                                                   |
| GO:0000904 | cell development                                                                     |
| GO:0000910 | cytokinesis                                                                          |
| GO:0000930 | gamma-tubulin complex                                                                |
| GO:0000940 | condensed chromosome, pericentric region                                             |
| GO:0001709 | cell fate commitment                                                                 |
| GO:0002164 | larval development                                                                   |
| GO:0002165 | instar larval or pupal development                                                   |
| GO:0002520 | immune system development                                                            |
| GO:0003002 | regionalization                                                                      |
| GO:0003676 | nucleic acid binding                                                                 |
| GO:0003677 | DNA binding                                                                          |
| GO:0003678 | DNA helicase activity                                                                |
| GO:0003682 | chromatin binding                                                                    |
| GO:0003702 | RNA polymerase II transcription factor activity                                      |
| GO:0003712 | transcription cofactor activity                                                      |
| GO:0003713 | transcription coactivator activity                                                   |
| GO:0003723 | RNA binding                                                                          |

|            |                                                                       |
|------------|-----------------------------------------------------------------------|
| GO:0003729 | mRNA binding                                                          |
| GO:0003730 | mRNA 3'-UTR binding                                                   |
| GO:0003777 | microtubule motor activity                                            |
| GO:0003887 | DNA-directed DNA polymerase activity                                  |
| GO:0004003 | ATP-dependent DNA helicase activity                                   |
| GO:0004386 | helicase activity                                                     |
| GO:0004518 | nuclease activity                                                     |
| GO:0004519 | endonuclease activity                                                 |
| GO:0004520 | endodeoxyribonuclease activity                                        |
| GO:0004527 | exonuclease activity                                                  |
| GO:0004529 | exodeoxyribonuclease activity                                         |
| GO:0004536 | deoxyribonuclease activity                                            |
| GO:0004672 | protein kinase activity                                               |
| GO:0004674 | protein serine/threonine kinase activity                              |
| GO:0004702 | receptor signaling protein serine/threonine kinase activity           |
| GO:0004708 | MAP kinase kinase activity                                            |
| GO:0004712 | protein serine/threonine/tyrosine kinase activity                     |
| GO:0004725 | protein tyrosine phosphatase activity                                 |
| GO:0004843 | ubiquitin-specific protease activity                                  |
| GO:0005515 | protein binding                                                       |
| GO:0005622 | intracellular                                                         |
| GO:0005623 | cell                                                                  |
| GO:0005634 | nucleus                                                               |
| GO:0005635 | nuclear envelope                                                      |
| GO:0005654 | nuclear lumen                                                         |
| GO:0005656 | pre-replicative complex                                               |
| GO:0005657 | replication fork                                                      |
| GO:0005663 | DNA replication factor C complex                                      |
| GO:0005664 | nuclear origin of replication recognition complex                     |
| GO:0005667 | transcription factor complex                                          |
| GO:0005669 | DNA-directed RNA polymerase II, holoenzyme                            |
| GO:0005678 | chromatin assembly complex                                            |
| GO:0005680 | anaphase-promoting complex                                            |
| GO:0005694 | chromosome                                                            |
| GO:0005700 | polytene chromosome                                                   |
| GO:0005813 | centrosome                                                            |
| GO:0005815 | microtubule organizing center                                         |
| GO:0005819 | spindle                                                               |
| GO:0005828 | kinetochore microtubule                                               |
| GO:0005856 | cytoskeleton                                                          |
| GO:0005871 | kinesin complex                                                       |
| GO:0005874 | microtubule                                                           |
| GO:0005876 | spindle microtubule                                                   |
| GO:0006139 | nucleobase, nucleoside, nucleotide and nucleic acid metabolic process |
| GO:0006259 | DNA metabolic process                                                 |
| GO:0006260 | DNA replication                                                       |
| GO:0006261 | DNA-dependent DNA replication                                         |
| GO:0006267 | pre-replicative complex assembly                                      |
| GO:0006270 | DNA-dependent DNA replication                                         |
| GO:0006275 | regulation of DNA replication                                         |
| GO:0006277 | DNA amplification                                                     |
| GO:0006281 | DNA repair                                                            |
| GO:0006289 | nucleotide-excision repair                                            |
| GO:0006310 | DNA recombination                                                     |
| GO:0006323 | DNA packaging                                                         |
| GO:0006325 | establishment and/or maintenance of chromatin architecture            |
| GO:0006334 | nucleosome assembly                                                   |
| GO:0006338 | chromatin remodeling                                                  |
| GO:0006350 | transcription                                                         |
| GO:0006351 | transcription, DNA-dependent                                          |
| GO:0006352 | transcription initiation                                              |
| GO:0006355 | regulation of transcription, DNA-dependent                            |

|            |                                                                  |
|------------|------------------------------------------------------------------|
| GO:0006357 | regulation of transcription from RNA polymerase II promoter      |
| GO:0006366 | transcription from RNA polymerase II promoter                    |
| GO:0006367 | transcription initiation from RNA polymerase II promoter         |
| GO:0006396 | RNA processing                                                   |
| GO:0006397 | mRNA processing                                                  |
| GO:0006401 | RNA catabolic process                                            |
| GO:0006402 | mRNA catabolic process                                           |
| GO:0006403 | RNA localization                                                 |
| GO:0006405 | RNA export from nucleus                                          |
| GO:0006406 | mRNA export from nucleus                                         |
| GO:0006417 | regulation of translation                                        |
| GO:0006461 | protein complex assembly                                         |
| GO:0006464 | protein modification process                                     |
| GO:0006468 | protein amino acid phosphorylation                               |
| GO:0006470 | protein amino acid dephosphorylation                             |
| GO:0006473 | protein amino acid acetylation                                   |
| GO:0006479 | protein amino acid methylation                                   |
| GO:0006605 | protein targeting                                                |
| GO:0006606 | protein import into nucleus                                      |
| GO:0006730 | one-carbon compound metabolic process                            |
| GO:0006793 | phosphorus metabolic process                                     |
| GO:0006796 | phosphate metabolic process                                      |
| GO:0006879 | cellular iron ion homeostasis                                    |
| GO:0006886 | intracellular protein transport                                  |
| GO:0006913 | nucleocytoplasmic transport                                      |
| GO:0006950 | response to stress                                               |
| GO:0006974 | response to DNA damage stimulus                                  |
| GO:0006996 | organelle organization and biogenesis                            |
| GO:0007010 | cytoskeleton organization and biogenesis                         |
| GO:0007015 | actin filament organization                                      |
| GO:0007017 | microtubule-based process                                        |
| GO:0007020 | microtubule nucleation                                           |
| GO:0007049 | cell cycle                                                       |
| GO:0007051 | spindle organization and biogenesis                              |
| GO:0007056 | female meiosis                                                   |
| GO:0007059 | chromosome segregation                                           |
| GO:0007062 | sister chromatid cohesion                                        |
| GO:0007067 | M phase of mitotic cell cycle                                    |
| GO:0007076 | M phase of mitotic cell cycle                                    |
| GO:0007088 | regulation of mitosis                                            |
| GO:0007093 | mitotic cell cycle checkpoint                                    |
| GO:0007094 | mitotic cell cycle spindle assembly checkpoint                   |
| GO:0007098 | centrosome cycle                                                 |
| GO:0007126 | M phase of meiotic cell cycle                                    |
| GO:0007127 | M phase of meiotic cell cycle                                    |
| GO:0007131 | M phase of meiotic cell cycle                                    |
| GO:0007143 | female meiosis                                                   |
| GO:0007154 | cell communication                                               |
| GO:0007163 | cell morphogenesis                                               |
| GO:0007165 | signal transduction                                              |
| GO:0007166 | cell surface receptor linked signal transduction                 |
| GO:0007167 | enzyme linked receptor protein signaling pathway                 |
| GO:0007169 | transmembrane receptor protein tyrosine kinase signaling pathway |
| GO:0007219 | Notch signaling pathway                                          |
| GO:0007242 | intracellular signaling cascade                                  |
| GO:0007264 | small GTPase mediated signal transduction                        |
| GO:0007265 | Ras protein signal transduction                                  |
| GO:0007266 | Rho protein signal transduction                                  |
| GO:0007275 | multicellular organismal development                             |
| GO:0007276 | gamete generation                                                |
| GO:0007280 | pole cell migration                                              |
| GO:0007281 | germ cell development                                            |

|            |                                                           |
|------------|-----------------------------------------------------------|
| GO:0007292 | female gamete generation                                  |
| GO:0007293 | germarium-derived egg chamber formation                   |
| GO:0007294 | germarium-derived oocyte fate determination               |
| GO:0007304 | ovarian follicle cell development                         |
| GO:0007306 | ovarian follicle cell development                         |
| GO:0007307 | ovarian follicle cell development                         |
| GO:0007346 | regulation of progression through mitotic cell cycle      |
| GO:0007389 | multicellular organismal development                      |
| GO:0007399 | nervous system development                                |
| GO:0008017 | microtubule binding                                       |
| GO:0008026 | ATP-dependent helicase activity                           |
| GO:0008094 | DNA-dependent ATPase activity                             |
| GO:0008104 | protein localization                                      |
| GO:0008134 | transcription factor binding                              |
| GO:0008156 | negative regulation of DNA replication                    |
| GO:0008168 | methyltransferase activity                                |
| GO:0008170 | N-methyltransferase activity                              |
| GO:0008213 | protein amino acid alkylation                             |
| GO:0008234 | cysteine-type peptidase activity                          |
| GO:0008276 | protein methyltransferase activity                        |
| GO:0008283 | cell proliferation                                        |
| GO:0008296 | 3'-5'-exodeoxyribonuclease activity                       |
| GO:0008356 | asymmetric cell division                                  |
| GO:0008361 | regulation of cell size                                   |
| GO:0008378 | galactosyltransferase activity                            |
| GO:0008380 | RNA splicing                                              |
| GO:0008757 | S-adenosylmethionine-dependent methyltransferase activity |
| GO:0009057 | macromolecule catabolic process                           |
| GO:0009653 | anatomical structure development                          |
| GO:0009719 | response to endogenous stimulus                           |
| GO:0009790 | embryonic development                                     |
| GO:0009791 | multicellular organismal development                      |
| GO:0009798 | axis specification                                        |
| GO:0009889 | regulation of biosynthetic process                        |
| GO:0009890 | negative regulation of biosynthetic process               |
| GO:0009892 | negative regulation of metabolic process                  |
| GO:0009893 | positive regulation of metabolic process                  |
| GO:0009948 | anterior/posterior axis specification                     |
| GO:0009949 | anterior/posterior axis specification                     |
| GO:0009950 | dorsal/ventral axis specification                         |
| GO:0009951 | dorsal/ventral axis specification                         |
| GO:0009952 | anterior/posterior pattern formation                      |
| GO:0009953 | dorsal/ventral pattern formation                          |
| GO:0009966 | regulation of signal transduction                         |
| GO:0009994 | oocyte differentiation                                    |
| GO:0010467 | gene expression                                           |
| GO:0010468 | regulation of gene expression                             |
| GO:0012505 | endomembrane system                                       |
| GO:0015031 | protein transport                                         |
| GO:0015630 | microtubule cytoskeleton                                  |
| GO:0015631 | tubulin binding                                           |
| GO:0016043 | cellular component organization and biogenesis            |
| GO:0016055 | Wnt receptor signaling pathway                            |
| GO:0016070 | RNA metabolic process                                     |
| GO:0016071 | mRNA metabolic process                                    |
| GO:0016251 | general RNA polymerase II transcription factor activity   |
| GO:0016278 | lysine N-methyltransferase activity                       |
| GO:0016279 | protein-lysine N-methyltransferase activity               |
| GO:0016301 | kinase activity                                           |
| GO:0016310 | phosphorylation                                           |
| GO:0016321 | female meiosis                                            |
| GO:0016333 | morphogenesis of follicular epithelium                    |

|            |                                                                                     |
|------------|-------------------------------------------------------------------------------------|
| GO:0016358 | generation of neurons                                                               |
| GO:0016455 | RNA polymerase II transcription mediator activity                                   |
| GO:0016458 | gene silencing                                                                      |
| GO:0016476 | shape changes of embryonic cells                                                    |
| GO:0016481 | negative regulation of transcription                                                |
| GO:0016538 | cyclin-dependent protein kinase regulator activity                                  |
| GO:0016563 | transcription activator activity                                                    |
| GO:0016564 | transcription repressor activity                                                    |
| GO:0016568 | chromatin modification                                                              |
| GO:0016569 | covalent chromatin modification                                                     |
| GO:0016570 | histone modification                                                                |
| GO:0016571 | histone methylation                                                                 |
| GO:0016572 | histone phosphorylation                                                             |
| GO:0016573 | histone acetylation                                                                 |
| GO:0016585 | chromatin remodeling complex                                                        |
| GO:0016591 | DNA-directed RNA polymerase II, holoenzyme                                          |
| GO:0016740 | transferase activity                                                                |
| GO:0016741 | transferase activity, transferring one-carbon groups                                |
| GO:0016772 | transferase activity, transferring phosphorus-containing groups                     |
| GO:0016773 | phosphotransferase activity, alcohol group as acceptor                              |
| GO:0016779 | nucleotidyltransferase activity                                                     |
| GO:0016895 | exodeoxyribonuclease activity, producing 5'-phosphomonoesters                       |
| GO:0017038 | protein import                                                                      |
| GO:0017124 | SH3 domain binding                                                                  |
| GO:0017145 | stem cell division                                                                  |
| GO:0017148 | negative regulation of translation                                                  |
| GO:0018024 | histone-lysine N-methyltransferase activity                                         |
| GO:0018992 | multicellular organismal development                                                |
| GO:0019205 | nucleobase, nucleoside, nucleotide kinase activity                                  |
| GO:0019219 | regulation of nucleobase, nucleoside, nucleotide and nucleic acid metabolic process |
| GO:0019220 | regulation of phosphate metabolic process                                           |
| GO:0019222 | regulation of metabolic process                                                     |
| GO:0019783 | small conjugating protein-specific protease activity                                |
| GO:0019899 | enzyme binding                                                                      |
| GO:0019904 | protein domain specific binding                                                     |
| GO:0019953 | sexual reproduction                                                                 |
| GO:0022008 | neurogenesis                                                                        |
| GO:0022402 | cell cycle                                                                          |
| GO:0022403 | cell cycle phase                                                                    |
| GO:0022607 | cellular component assembly                                                         |
| GO:0030030 | cell morphogenesis                                                                  |
| GO:0030032 | lamellipodium biogenesis                                                            |
| GO:0030097 | hemopoiesis                                                                         |
| GO:0030154 | cell differentiation                                                                |
| GO:0030182 | generation of neurons                                                               |
| GO:0030237 | multicellular organismal development                                                |
| GO:0030261 | chromosome condensation                                                             |
| GO:0030381 | ovarian follicle cell development                                                   |
| GO:0030703 | eggshell formation                                                                  |
| GO:0030706 | germarium-derived oocyte differentiation                                            |
| GO:0030707 | ovarian follicle cell development                                                   |
| GO:0030716 | oocyte fate determination                                                           |
| GO:0030717 | karyosome formation                                                                 |
| GO:0030720 | germarium-derived egg chamber formation                                             |
| GO:0030727 | germarium-derived female germ-line cyst formation                                   |
| GO:0030894 | replication fork                                                                    |
| GO:0031023 | microtubule organizing center organization and biogenesis                           |
| GO:0031056 | regulation of histone modification                                                  |
| GO:0031123 | RNA 3'-end processing                                                               |
| GO:0031124 | mRNA 3'-end processing                                                              |
| GO:0031175 | generation of neurons                                                               |
| GO:0031323 | regulation of cellular metabolic process                                            |

|            |                                                      |
|------------|------------------------------------------------------|
| GO:0031324 | negative regulation of cellular metabolic process    |
| GO:0031325 | positive regulation of cellular metabolic process    |
| GO:0031326 | regulation of cellular biosynthetic process          |
| GO:0031327 | negative regulation of cellular biosynthetic process |
| GO:0031497 | chromatin assembly                                   |
| GO:0031519 | PcG protein complex                                  |
| GO:0031523 | Myb complex                                          |
| GO:0031577 | spindle checkpoint                                   |
| GO:0031965 | nuclear envelope                                     |
| GO:0031974 | membrane-enclosed lumen                              |
| GO:0031981 | nuclear lumen                                        |
| GO:0032259 | methylation                                          |
| GO:0032502 | developmental process                                |
| GO:0032774 | RNA biosynthetic process                             |
| GO:0032837 | distributive segregation                             |
| GO:0032989 | cellular structure morphogenesis                     |
| GO:0032990 | cell part morphogenesis                              |
| GO:0032991 | macromolecular complex                               |
| GO:0033036 | macromolecule localization                           |
| GO:0033301 | cell cycle comprising mitosis without cytokinesis    |
| GO:0035060 | brahma complex                                       |
| GO:0035102 | PRC1 complex                                         |
| GO:0035186 | syncytial blastoderm mitotic cell cycle              |
| GO:0035250 | UDP-galactosyltransferase activity                   |
| GO:0035303 | regulation of dephosphorylation                      |
| GO:0035304 | regulation of protein amino acid dephosphorylation   |
| GO:0040029 | regulation of gene expression, epigenetic            |
| GO:0042054 | histone methyltransferase activity                   |
| GO:0042078 | germ cell development                                |
| GO:0042575 | DNA polymerase complex                               |
| GO:0042813 | Wnt receptor activity                                |
| GO:0043138 | 3'-5' DNA helicase activity                          |
| GO:0043170 | macromolecule metabolic process                      |
| GO:0043226 | organelle                                            |
| GO:0043227 | membrane-bound organelle                             |
| GO:0043228 | non-membrane-bound organelle                         |
| GO:0043229 | intracellular organelle                              |
| GO:0043231 | intracellular membrane-bound organelle               |
| GO:0043232 | intracellular non-membrane-bound organelle           |
| GO:0043233 | organelle lumen                                      |
| GO:0043234 | protein complex                                      |
| GO:0043283 | biopolymer metabolic process                         |
| GO:0043285 | biopolymer catabolic process                         |
| GO:0043412 | biopolymer modification                              |
| GO:0043414 | biopolymer methylation                               |
| GO:0043543 | protein amino acid acylation                         |
| GO:0043565 | sequence-specific DNA binding                        |
| GO:0043596 | nuclear replication fork                             |
| GO:0043601 | nuclear replication fork                             |
| GO:0043623 | cellular protein complex assembly                    |
| GO:0043687 | post-translational protein modification              |
| GO:0044237 | cellular metabolic process                           |
| GO:0044238 | primary metabolic process                            |
| GO:0044422 | organelle                                            |
| GO:0044424 | intracellular                                        |
| GO:0044427 | chromosome                                           |
| GO:0044428 | nucleus                                              |
| GO:0044430 | cytoskeleton                                         |
| GO:0044446 | intracellular organelle                              |
| GO:0044450 | microtubule organizing center                        |
| GO:0044451 | nuclear lumen                                        |
| GO:0044453 | nuclear envelope                                     |



|            |                                                                                              |
|------------|----------------------------------------------------------------------------------------------|
| GO:0044454 | nuclear chromosome                                                                           |
| GO:0044464 | cell                                                                                         |
| GO:0045132 | M phase of meiotic cell cycle                                                                |
| GO:0045165 | cell fate commitment                                                                         |
| GO:0045184 | establishment of protein localization                                                        |
| GO:0045448 | mitotic cell cycle, embryonic                                                                |
| GO:0045449 | regulation of transcription                                                                  |
| GO:0045478 | fusome organization and biogenesis                                                           |
| GO:0045786 | negative regulation of progression through cell cycle                                        |
| GO:0045892 | negative regulation of transcription, DNA-dependent                                          |
| GO:0045893 | positive regulation of transcription, DNA-dependent                                          |
| GO:0045934 | negative regulation of nucleobase, nucleoside, nucleotide and nucleic acid metabolic process |
| GO:0045935 | positive regulation of nucleobase, nucleoside, nucleotide and nucleic acid metabolic process |
| GO:0045941 | positive regulation of transcription                                                         |
| GO:0045944 | positive regulation of transcription from RNA polymerase II promoter                         |
| GO:0046907 | intracellular transport                                                                      |
| GO:0046974 | histone lysine N-methyltransferase activity (H3-K9 specific)                                 |
| GO:0048024 | regulation of nuclear mRNA splicing, via spliceosome                                         |
| GO:0048134 | germ cell development                                                                        |
| GO:0048135 | female germ-line cyst formation                                                              |
| GO:0048468 | cell development                                                                             |
| GO:0048477 | oogenesis                                                                                    |
| GO:0048513 | organ development                                                                            |
| GO:0048518 | positive regulation of biological process                                                    |
| GO:0048519 | negative regulation of biological process                                                    |
| GO:0048522 | positive regulation of cellular process                                                      |
| GO:0048523 | negative regulation of cellular process                                                      |
| GO:0048534 | hemopoietic or lymphoid organ development                                                    |
| GO:0048646 | anatomical structure development                                                             |
| GO:0048666 | generation of neurons                                                                        |
| GO:0048667 | neuron morphogenesis during differentiation                                                  |
| GO:0048699 | generation of neurons                                                                        |
| GO:0048731 | system development                                                                           |
| GO:0048812 | neuron morphogenesis during differentiation                                                  |
| GO:0048813 | dendrite morphogenesis                                                                       |
| GO:0048856 | anatomical structure development                                                             |
| GO:0048858 | cell morphogenesis                                                                           |
| GO:0048869 | cellular developmental process                                                               |
| GO:0050657 | nucleic acid transport                                                                       |
| GO:0050658 | RNA transport                                                                                |
| GO:0050684 | regulation of mRNA processing                                                                |
| GO:0050789 | regulation of biological process                                                             |
| GO:0050794 | regulation of cellular process                                                               |
| GO:0051017 | actin filament bundle formation                                                              |
| GO:0051052 | regulation of DNA metabolic process                                                          |
| GO:0051053 | negative regulation of DNA metabolic process                                                 |
| GO:0051128 | regulation of cellular component organization and biogenesis                                 |
| GO:0051168 | nuclear export                                                                               |
| GO:0051169 | nuclear transport                                                                            |
| GO:0051170 | nuclear import                                                                               |
| GO:0051174 | regulation of phosphorus metabolic process                                                   |
| GO:0051179 | localization                                                                                 |
| GO:0051225 | spindle assembly                                                                             |
| GO:0051234 | establishment of localization                                                                |
| GO:0051236 | establishment of RNA localization                                                            |
| GO:0051246 | regulation of protein metabolic process                                                      |
| GO:0051248 | negative regulation of protein metabolic process                                             |
| GO:0051252 | regulation of RNA metabolic process                                                          |
| GO:0051276 | chromosome organization and biogenesis                                                       |
| GO:0051297 | centrosome organization and biogenesis                                                       |
| GO:0051301 | cell division                                                                                |
| GO:0051320 | interphase                                                                                   |

|            |                                    |
|------------|------------------------------------|
| GO:0051321 | meiotic cell cycle                 |
| GO:0051322 | anaphase                           |
| GO:0051325 | interphase                         |
| GO:0051327 | M phase of meiotic cell cycle      |
| GO:0051329 | interphase of mitotic cell cycle   |
| GO:0051641 | cellular localization              |
| GO:0051649 | cellular localization              |
| GO:0051674 | localization of cell               |
| GO:0051726 | regulation of cell cycle           |
| GO:0055072 | iron ion homeostasis               |
| GO:0065001 | specification of axis polarity     |
| GO:0065003 | macromolecular complex assembly    |
| GO:0065004 | protein-DNA complex assembly       |
| GO:0065007 | biological regulation              |
| GO:0065009 | regulation of a molecular function |

Table S1E: Gene Ontologies Up-regulated in yw, w1118 DR and Canton-S DR. All gene ontologies have at least 5 genes in the GO and p value < 0.05.

|            |                                                                 |
|------------|-----------------------------------------------------------------|
| GO:0000038 | very-long-chain fatty acid metabolic process                    |
| GO:0000267 | cell fraction                                                   |
| GO:0000902 | cell morphogenesis                                              |
| GO:0000904 | cell development                                                |
| GO:0001505 | regulation of neurotransmitter levels                           |
| GO:0001736 | establishment of planar polarity                                |
| GO:0001738 | morphogenesis of a polarized epithelium                         |
| GO:0001751 | compound eye photoreceptor cell differentiation                 |
| GO:0001752 | compound eye photoreceptor fate commitment                      |
| GO:0001754 | eye photoreceptor cell differentiation                          |
| GO:0002165 | instar larval or pupal development                              |
| GO:0002376 | immune system process                                           |
| GO:0003008 | system process                                                  |
| GO:0003779 | actin binding                                                   |
| GO:0004035 | alkaline phosphatase activity                                   |
| GO:0004175 | endopeptidase activity                                          |
| GO:0004263 | chymotrypsin activity                                           |
| GO:0004723 | calcium-dependent protein serine/threonine phosphatase activity |
| GO:0005102 | receptor binding                                                |
| GO:0005184 | neuropeptide hormone activity                                   |
| GO:0005200 | structural constituent of cytoskeleton                          |
| GO:0005275 | amine transmembrane transporter activity                        |
| GO:0005283 | sodium:amino acid symporter activity                            |
| GO:0005328 | neurotransmitter:sodium symporter activity                      |
| GO:0005342 | organic acid transmembrane transporter activity                 |
| GO:0005416 | cation:amino acid symporter activity                            |
| GO:0005509 | calcium ion binding                                             |
| GO:0005515 | protein binding                                                 |
| GO:0005516 | calmodulin binding                                              |
| GO:0005578 | proteinaceous extracellular matrix                              |
| GO:0005604 | basement membrane                                               |
| GO:0005624 | membrane fraction                                               |
| GO:0005792 | microsome                                                       |
| GO:0005859 | muscle myosin complex                                           |
| GO:0005865 | sarcomere                                                       |
| GO:0005886 | plasma membrane                                                 |
| GO:0005887 | integral to plasma membrane                                     |
| GO:0006810 | transport                                                       |
| GO:0006811 | ion transport                                                   |
| GO:0006812 | cation transport                                                |
| GO:0006817 | phosphate transport                                             |
| GO:0006820 | anion transport                                                 |

|            |                                                                                   |
|------------|-----------------------------------------------------------------------------------|
| GO:0006874 | cellular calcium ion homeostasis                                                  |
| GO:0006928 | cell motility                                                                     |
| GO:0006952 | defense response                                                                  |
| GO:0006955 | immune response                                                                   |
| GO:0007154 | cell communication                                                                |
| GO:0007155 | cell adhesion                                                                     |
| GO:0007164 | establishment of tissue polarity                                                  |
| GO:0007165 | signal transduction                                                               |
| GO:0007166 | cell surface receptor linked signal transduction                                  |
| GO:0007167 | enzyme linked receptor protein signaling pathway                                  |
| GO:0007169 | transmembrane receptor protein tyrosine kinase signaling pathway                  |
| GO:0007186 | G-protein coupled receptor protein signaling pathway                              |
| GO:0007200 | G-protein signaling, coupled to IP3 second messenger (phospholipase C activating) |
| GO:0007218 | neuropeptide signaling pathway                                                    |
| GO:0007242 | intracellular signaling cascade                                                   |
| GO:0007267 | cell-cell signaling                                                               |
| GO:0007268 | synaptic transmission                                                             |
| GO:0007275 | multicellular organismal development                                              |
| GO:0007399 | nervous system development                                                        |
| GO:0007409 | axonogenesis                                                                      |
| GO:0007411 | axonogenesis                                                                      |
| GO:0007416 | synaptogenesis                                                                    |
| GO:0007424 | open tracheal system development                                                  |
| GO:0007431 | salivary gland development                                                        |
| GO:0007432 | salivary gland boundary specification                                             |
| GO:0007439 | ectodermal gut development                                                        |
| GO:0007447 | imaginal disc development                                                         |
| GO:0007472 | wing disc morphogenesis                                                           |
| GO:0007473 | wing disc proximal/distal pattern formation                                       |
| GO:0007476 | imaginal disc-derived wing morphogenesis                                          |
| GO:0007478 | leg disc morphogenesis                                                            |
| GO:0007498 | mesoderm development                                                              |
| GO:0007507 | heart development                                                                 |
| GO:0007517 | muscle development                                                                |
| GO:0007519 | skeletal muscle development                                                       |
| GO:0007525 | somatic muscle development                                                        |
| GO:0007528 | skeletal muscle fiber development                                                 |
| GO:0007548 | sex differentiation                                                               |
| GO:0007601 | visual perception                                                                 |
| GO:0007602 | phototransduction                                                                 |
| GO:0007623 | circadian rhythm                                                                  |
| GO:0008020 | G-protein coupled photoreceptor activity                                          |
| GO:0008083 | growth factor activity                                                            |
| GO:0008084 | imaginal disc growth factor activity                                              |
| GO:0008092 | cytoskeletal protein binding                                                      |
| GO:0008253 | 5'-nucleotidase activity                                                          |
| GO:0008271 | secondary active sulfate transmembrane transporter activity                       |
| GO:0008277 | regulation of G-protein coupled receptor protein signaling pathway                |
| GO:0008324 | cation transmembrane transporter activity                                         |
| GO:0008507 | sodium:iodide symporter activity                                                  |
| GO:0008509 | anion transmembrane transporter activity                                          |
| GO:0008543 | fibroblast growth factor receptor signaling pathway                               |
| GO:0008586 | imaginal disc-derived wing morphogenesis                                          |
| GO:0009309 | amine biosynthetic process                                                        |
| GO:0009314 | response to radiation                                                             |
| GO:0009416 | response to light stimulus                                                        |
| GO:0009581 | detection of external stimulus                                                    |
| GO:0009582 | detection of abiotic stimulus                                                     |
| GO:0009583 | detection of light stimulus                                                       |
| GO:0009584 | detection of visible light                                                        |
| GO:0009586 | rhodopsin mediated phototransduction                                              |
| GO:0009595 | detection of biotic stimulus                                                      |

|            |                                                                                         |
|------------|-----------------------------------------------------------------------------------------|
| GO:0009605 | response to external stimulus                                                           |
| GO:0009607 | response to biotic stimulus                                                             |
| GO:0009617 | response to bacterium                                                                   |
| GO:0009628 | response to abiotic stimulus                                                            |
| GO:0009791 | multicellular organismal development                                                    |
| GO:0009881 | photoreceptor activity                                                                  |
| GO:0009888 | organ development                                                                       |
| GO:0014706 | striated muscle development                                                             |
| GO:0015075 | ion transmembrane transporter activity                                                  |
| GO:0015101 | organic cation transmembrane transporter activity                                       |
| GO:0015116 | sulfate transmembrane transporter activity                                              |
| GO:0015179 | L-amino acid transmembrane transporter activity                                         |
| GO:0015291 | secondary active transmembrane transporter activity                                     |
| GO:0015293 | symporter activity                                                                      |
| GO:0015294 | solute:cation symporter activity                                                        |
| GO:0015296 | anion:cation symporter activity                                                         |
| GO:0015370 | solute:sodium symporter activity                                                        |
| GO:0015373 | monovalent anion:sodium symporter activity                                              |
| GO:0015381 | high affinity sulfate transmembrane transporter activity                                |
| GO:0015629 | actin cytoskeleton                                                                      |
| GO:0015698 | inorganic anion transport                                                               |
| GO:0016020 | membrane                                                                                |
| GO:0016021 | integral to membrane                                                                    |
| GO:0016023 | cytoplasmic membrane-bound vesicle                                                      |
| GO:0016027 | rhabdomere                                                                              |
| GO:0016028 | rhabdomere                                                                              |
| GO:0016045 | detection of bacterium                                                                  |
| GO:0016059 | deactivation of rhodopsin mediated signaling                                            |
| GO:0016459 | actin cytoskeleton                                                                      |
| GO:0016460 | myosin II complex                                                                       |
| GO:0016477 | cell migration                                                                          |
| GO:0016511 | endothelin-converting enzyme activity                                                   |
| GO:0016787 | hydrolase activity                                                                      |
| GO:0016791 | phosphoric monoester hydrolase activity                                                 |
| GO:0016810 | hydrolase activity, acting on carbon-nitrogen (but not peptide) bonds                   |
| GO:0016811 | hydrolase activity, acting on carbon-nitrogen (but not peptide) bonds, in linear amides |
| GO:0019226 | transmission of nerve impulse                                                           |
| GO:0019722 | calcium-mediated signaling                                                              |
| GO:0019897 | extrinsic to plasma membrane                                                            |
| GO:0019898 | extrinsic to membrane                                                                   |
| GO:0019932 | second-messenger-mediated signaling                                                     |
| GO:0021700 | developmental maturation                                                                |
| GO:0022008 | neurogenesis                                                                            |
| GO:0022610 | biological adhesion                                                                     |
| GO:0022804 | active transmembrane transporter activity                                               |
| GO:0022857 | transmembrane transporter activity                                                      |
| GO:0022891 | substrate-specific transmembrane transporter activity                                   |
| GO:0022892 | substrate-specific transporter activity                                                 |
| GO:0030016 | myofibril                                                                               |
| GO:0030017 | sarcomere                                                                               |
| GO:0030029 | actin filament-based process                                                            |
| GO:0030030 | cell morphogenesis                                                                      |
| GO:0030036 | actin cytoskeleton organization and biogenesis                                          |
| GO:0030154 | cell differentiation                                                                    |
| GO:0030182 | generation of neurons                                                                   |
| GO:0030239 | myoblast maturation                                                                     |
| GO:0031012 | extracellular matrix                                                                    |
| GO:0031175 | generation of neurons                                                                   |
| GO:0031224 | intrinsic to membrane                                                                   |
| GO:0031226 | intrinsic to plasma membrane                                                            |
| GO:0031410 | cytoplasmic vesicle                                                                     |
| GO:0031982 | vesicle                                                                                 |

|            |                                                          |
|------------|----------------------------------------------------------|
| GO:0031988 | membrane-bound vesicle                                   |
| GO:0032501 | multicellular organismal process                         |
| GO:0032989 | cellular structure morphogenesis                         |
| GO:0032990 | cell part morphogenesis                                  |
| GO:0035107 | appendage morphogenesis                                  |
| GO:0035114 | imaginal disc-derived appendage morphogenesis            |
| GO:0035152 | regulation of tube architecture, open tracheal system    |
| GO:0035153 | epithelial cell type specification, open tracheal system |
| GO:0035215 | genital disc development                                 |
| GO:0035216 | haltere disc development                                 |
| GO:0035218 | leg disc development                                     |
| GO:0035220 | wing disc development                                    |
| GO:0035222 | wing disc pattern formation                              |
| GO:0035272 | exocrine system development                              |
| GO:0035277 | spiracle morphogenesis, open tracheal system             |
| GO:0042133 | regulation of neurotransmitter levels                    |
| GO:0042136 | neurotransmitter biosynthetic process                    |
| GO:0042330 | taxis                                                    |
| GO:0042398 | amino acid derivative biosynthetic process               |
| GO:0042445 | hormone metabolic process                                |
| GO:0042578 | phosphoric ester hydrolase activity                      |
| GO:0042592 | homeostatic process                                      |
| GO:0042598 | vesicular fraction                                       |
| GO:0042692 | muscle cell differentiation                              |
| GO:0042706 | eye photoreceptor cell fate commitment                   |
| GO:0042742 | defense response to bacterium                            |
| GO:0042995 | cell projection                                          |
| GO:0043167 | ion binding                                              |
| GO:0043169 | cation binding                                           |
| GO:0043190 | ATP-binding cassette (ABC) transporter complex           |
| GO:0043292 | contractile fiber                                        |
| GO:0044271 | nitrogen compound biosynthetic process                   |
| GO:0044420 | extracellular matrix                                     |
| GO:0044421 | extracellular region                                     |
| GO:0044425 | membrane                                                 |
| GO:0044449 | contractile fiber                                        |
| GO:0044459 | plasma membrane part                                     |
| GO:0045137 | multicellular organismal development                     |
| GO:0045165 | cell fate commitment                                     |
| GO:0045211 | postsynaptic membrane                                    |
| GO:0045445 | skeletal muscle fiber development                        |
| GO:0046530 | photoreceptor cell differentiation                       |
| GO:0046552 | photoreceptor cell fate commitment                       |
| GO:0046661 | multicellular organismal development                     |
| GO:0046872 | metal ion binding                                        |
| GO:0046943 | carboxylic acid transmembrane transporter activity       |
| GO:0046983 | protein dimerization activity                            |
| GO:0048015 | phosphoinositide-mediated signaling                      |
| GO:0048468 | cell development                                         |
| GO:0048469 | cell development                                         |
| GO:0048511 | rhythmic process                                         |
| GO:0048512 | circadian behavior                                       |
| GO:0048513 | organ development                                        |
| GO:0048565 | gut development                                          |
| GO:0048567 | ectodermal gut morphogenesis                             |
| GO:0048627 | skeletal muscle fiber development                        |
| GO:0048628 | myoblast maturation                                      |
| GO:0048666 | generation of neurons                                    |
| GO:0048667 | neuron morphogenesis during differentiation              |
| GO:0048699 | generation of neurons                                    |
| GO:0048731 | system development                                       |
| GO:0048732 | gland development                                        |

|            |                                                       |
|------------|-------------------------------------------------------|
| GO:0048736 | appendage development                                 |
| GO:0048737 | imaginal disc-derived appendage development           |
| GO:0048741 | skeletal muscle fiber development                     |
| GO:0048747 | muscle fiber development                              |
| GO:0048812 | neuron morphogenesis during differentiation           |
| GO:0048856 | anatomical structure development                      |
| GO:0048858 | cell morphogenesis                                    |
| GO:0048869 | cellular developmental process                        |
| GO:0050789 | regulation of biological process                      |
| GO:0050790 | regulation of catalytic activity                      |
| GO:0050793 | regulation of developmental process                   |
| GO:0050808 | synapse organization and biogenesis                   |
| GO:0050877 | neurological system process                           |
| GO:0050896 | response to stimulus                                  |
| GO:0050906 | detection of stimulus during sensory perception       |
| GO:0050908 | detection of light stimulus during visual perception  |
| GO:0050953 | sensory perception of light stimulus                  |
| GO:0050962 | detection of light stimulus during sensory perception |
| GO:0051146 | striated muscle cell differentiation                  |
| GO:0051179 | localization                                          |
| GO:0051234 | establishment of localization                         |
| GO:0051606 | detection of stimulus                                 |
| GO:0051674 | localization of cell                                  |
| GO:0051704 | multi-organism process                                |
| GO:0051707 | response to other organism                            |
| GO:0055001 | muscle cell development                               |
| GO:0055002 | striated muscle cell development                      |
| GO:0055074 | calcium ion homeostasis                               |
| GO:0065007 | biological regulation                                 |
| GO:0065008 | regulation of biological quality                      |
| GO:0065009 | regulation of a molecular function                    |

Table S1F: Gene Ontologies Down-regulated in yw, w1118 DR and Canton-S DR. All gene ontologies have at least 5 genes in the GO and p value < 0.05.

|            |                                                                                      |
|------------|--------------------------------------------------------------------------------------|
| GO:0000070 | M phase of mitotic cell cycle                                                        |
| GO:0000074 | regulation of progression through cell cycle                                         |
| GO:0000075 | cell cycle checkpoint                                                                |
| GO:0000082 | interphase of mitotic cell cycle                                                     |
| GO:0000084 | interphase of mitotic cell cycle                                                     |
| GO:0000087 | M phase of mitotic cell cycle                                                        |
| GO:0000119 | DNA-directed RNA polymerase II, holoenzyme                                           |
| GO:0000122 | negative regulation of transcription from RNA polymerase II promoter                 |
| GO:0000226 | microtubule cytoskeleton organization and biogenesis                                 |
| GO:0000228 | nuclear chromosome                                                                   |
| GO:0000278 | mitotic cell cycle                                                                   |
| GO:0000279 | M phase                                                                              |
| GO:0000375 | RNA splicing, via transesterification reactions                                      |
| GO:0000377 | RNA splicing, via transesterification reactions with bulged adenosine as nucleophile |
| GO:0000380 | alternative nuclear mRNA splicing, via spliceosome                                   |
| GO:0000381 | regulation of alternative nuclear mRNA splicing, via spliceosome                     |
| GO:0000398 | nuclear mRNA splicing, via spliceosome                                               |
| GO:0000775 | chromosome, pericentric region                                                       |
| GO:0000776 | chromosome, pericentric region                                                       |
| GO:0000777 | condensed chromosome, pericentric region                                             |
| GO:0000779 | condensed chromosome, pericentric region                                             |
| GO:0000785 | chromatin                                                                            |
| GO:0000792 | heterochromatin                                                                      |
| GO:0000793 | condensed chromosome                                                                 |
| GO:0000808 | origin recognition complex                                                           |
| GO:0000819 | sister chromatid segregation                                                         |

|            |                                                                       |
|------------|-----------------------------------------------------------------------|
| GO:0000910 | cytokinesis                                                           |
| GO:0000940 | condensed chromosome, pericentric region                              |
| GO:0003002 | regionalization                                                       |
| GO:0003676 | nucleic acid binding                                                  |
| GO:0003677 | DNA binding                                                           |
| GO:0003678 | DNA helicase activity                                                 |
| GO:0003682 | chromatin binding                                                     |
| GO:0003702 | RNA polymerase II transcription factor activity                       |
| GO:0003712 | transcription cofactor activity                                       |
| GO:0003713 | transcription coactivator activity                                    |
| GO:0003723 | RNA binding                                                           |
| GO:0003729 | mRNA binding                                                          |
| GO:0003777 | microtubule motor activity                                            |
| GO:0003887 | DNA-directed DNA polymerase activity                                  |
| GO:0004003 | ATP-dependent DNA helicase activity                                   |
| GO:0004386 | helicase activity                                                     |
| GO:0004518 | nuclease activity                                                     |
| GO:0004519 | endonuclease activity                                                 |
| GO:0004520 | endodeoxyribonuclease activity                                        |
| GO:0004529 | exodeoxyribonuclease activity                                         |
| GO:0004536 | deoxyribonuclease activity                                            |
| GO:0004672 | protein kinase activity                                               |
| GO:0004674 | protein serine/threonine kinase activity                              |
| GO:0005515 | protein binding                                                       |
| GO:0005622 | intracellular                                                         |
| GO:0005623 | cell                                                                  |
| GO:0005634 | nucleus                                                               |
| GO:0005635 | nuclear envelope                                                      |
| GO:0005654 | nuclear lumen                                                         |
| GO:0005656 | pre-replicative complex                                               |
| GO:0005657 | replication fork                                                      |
| GO:0005663 | DNA replication factor C complex                                      |
| GO:0005664 | nuclear origin of replication recognition complex                     |
| GO:0005667 | transcription factor complex                                          |
| GO:0005669 | DNA-directed RNA polymerase II, holoenzyme                            |
| GO:0005678 | chromatin assembly complex                                            |
| GO:0005694 | chromosome                                                            |
| GO:0005700 | polytene chromosome                                                   |
| GO:0005813 | centrosome                                                            |
| GO:0005815 | microtubule organizing center                                         |
| GO:0005819 | spindle                                                               |
| GO:0005828 | kinetochore microtubule                                               |
| GO:0005856 | cytoskeleton                                                          |
| GO:0005871 | kinesin complex                                                       |
| GO:0005874 | microtubule                                                           |
| GO:0005876 | spindle microtubule                                                   |
| GO:0006139 | nucleobase, nucleoside, nucleotide and nucleic acid metabolic process |
| GO:0006259 | DNA metabolic process                                                 |
| GO:0006260 | DNA replication                                                       |
| GO:0006261 | DNA-dependent DNA replication                                         |
| GO:0006267 | pre-replicative complex assembly                                      |
| GO:0006270 | DNA-dependent DNA replication                                         |
| GO:0006275 | regulation of DNA replication                                         |
| GO:0006277 | DNA amplification                                                     |
| GO:0006281 | DNA repair                                                            |
| GO:0006289 | nucleotide-excision repair                                            |
| GO:0006310 | DNA recombination                                                     |
| GO:0006334 | nucleosome assembly                                                   |
| GO:0006350 | transcription                                                         |
| GO:0006351 | transcription, DNA-dependent                                          |
| GO:0006352 | transcription initiation                                              |
| GO:0006355 | regulation of transcription, DNA-dependent                            |

|            |                                                             |
|------------|-------------------------------------------------------------|
| GO:0006357 | regulation of transcription from RNA polymerase II promoter |
| GO:0006366 | transcription from RNA polymerase II promoter               |
| GO:0006367 | transcription initiation from RNA polymerase II promoter    |
| GO:0006396 | RNA processing                                              |
| GO:0006397 | mRNA processing                                             |
| GO:0006464 | protein modification process                                |
| GO:0006468 | protein amino acid phosphorylation                          |
| GO:0006470 | protein amino acid dephosphorylation                        |
| GO:0006606 | protein import into nucleus                                 |
| GO:0006793 | phosphorus metabolic process                                |
| GO:0006796 | phosphate metabolic process                                 |
| GO:0006950 | response to stress                                          |
| GO:0006974 | response to DNA damage stimulus                             |
| GO:0006996 | organelle organization and biogenesis                       |
| GO:0007010 | cytoskeleton organization and biogenesis                    |
| GO:0007017 | microtubule-based process                                   |
| GO:0007049 | cell cycle                                                  |
| GO:0007051 | spindle organization and biogenesis                         |
| GO:0007059 | chromosome segregation                                      |
| GO:0007067 | M phase of mitotic cell cycle                               |
| GO:0007076 | M phase of mitotic cell cycle                               |
| GO:0007088 | regulation of mitosis                                       |
| GO:0007093 | mitotic cell cycle checkpoint                               |
| GO:0007094 | mitotic cell cycle spindle assembly checkpoint              |
| GO:0007098 | centrosome cycle                                            |
| GO:0007126 | M phase of meiotic cell cycle                               |
| GO:0007127 | M phase of meiotic cell cycle                               |
| GO:0007131 | M phase of meiotic cell cycle                               |
| GO:0007143 | female meiosis                                              |
| GO:0007275 | multicellular organismal development                        |
| GO:0007276 | gamete generation                                           |
| GO:0007280 | pole cell migration                                         |
| GO:0007281 | germ cell development                                       |
| GO:0007292 | female gamete generation                                    |
| GO:0007293 | germarium-derived egg chamber formation                     |
| GO:0007294 | germarium-derived oocyte fate determination                 |
| GO:0007304 | ovarian follicle cell development                           |
| GO:0007306 | ovarian follicle cell development                           |
| GO:0007307 | ovarian follicle cell development                           |
| GO:0007346 | regulation of progression through mitotic cell cycle        |
| GO:0007389 | multicellular organismal development                        |
| GO:0008026 | ATP-dependent helicase activity                             |
| GO:0008094 | DNA-dependent ATPase activity                               |
| GO:0008134 | transcription factor binding                                |
| GO:0008156 | negative regulation of DNA replication                      |
| GO:0008168 | methyltransferase activity                                  |
| GO:0008276 | protein methyltransferase activity                          |
| GO:0008283 | cell proliferation                                          |
| GO:0008296 | 3'-5'-exodeoxyribonuclease activity                         |
| GO:0008356 | asymmetric cell division                                    |
| GO:0008380 | RNA splicing                                                |
| GO:0009653 | anatomical structure development                            |
| GO:0009719 | response to endogenous stimulus                             |
| GO:0009790 | embryonic development                                       |
| GO:0009798 | axis specification                                          |
| GO:0009892 | negative regulation of metabolic process                    |
| GO:0009893 | positive regulation of metabolic process                    |
| GO:0009948 | anterior/posterior axis specification                       |
| GO:0009949 | anterior/posterior axis specification                       |
| GO:0009950 | dorsal/ventral axis specification                           |
| GO:0009951 | dorsal/ventral axis specification                           |
| GO:0009952 | anterior/posterior pattern formation                        |



|            |                                                                                     |
|------------|-------------------------------------------------------------------------------------|
| GO:0009953 | dorsal/ventral pattern formation                                                    |
| GO:0009994 | oocyte differentiation                                                              |
| GO:0010467 | gene expression                                                                     |
| GO:0010468 | regulation of gene expression                                                       |
| GO:0015630 | microtubule cytoskeleton                                                            |
| GO:0016043 | cellular component organization and biogenesis                                      |
| GO:0016070 | RNA metabolic process                                                               |
| GO:0016071 | mRNA metabolic process                                                              |
| GO:0016251 | general RNA polymerase II transcription factor activity                             |
| GO:0016301 | kinase activity                                                                     |
| GO:0016310 | phosphorylation                                                                     |
| GO:0016321 | female meiosis                                                                      |
| GO:0016455 | RNA polymerase II transcription mediator activity                                   |
| GO:0016481 | negative regulation of transcription                                                |
| GO:0016538 | cyclin-dependent protein kinase regulator activity                                  |
| GO:0016563 | transcription activator activity                                                    |
| GO:0016564 | transcription repressor activity                                                    |
| GO:0016568 | chromatin modification                                                              |
| GO:0016569 | covalent chromatin modification                                                     |
| GO:0016570 | histone modification                                                                |
| GO:0016572 | histone phosphorylation                                                             |
| GO:0016591 | DNA-directed RNA polymerase II, holoenzyme                                          |
| GO:0016740 | transferase activity                                                                |
| GO:0016772 | transferase activity, transferring phosphorus-containing groups                     |
| GO:0016773 | phosphotransferase activity, alcohol group as acceptor                              |
| GO:0016779 | nucleotidyltransferase activity                                                     |
| GO:0016895 | exodeoxyribonuclease activity, producing 5'-phosphomonoesters                       |
| GO:0017038 | protein import                                                                      |
| GO:0019219 | regulation of nucleobase, nucleoside, nucleotide and nucleic acid metabolic process |
| GO:0019220 | regulation of phosphate metabolic process                                           |
| GO:0019222 | regulation of metabolic process                                                     |
| GO:0019953 | sexual reproduction                                                                 |
| GO:0022402 | cell cycle                                                                          |
| GO:0022403 | cell cycle phase                                                                    |
| GO:0022607 | cellular component assembly                                                         |
| GO:0030154 | cell differentiation                                                                |
| GO:0030261 | chromosome condensation                                                             |
| GO:0030703 | eggshell formation                                                                  |
| GO:0030706 | germarium-derived oocyte differentiation                                            |
| GO:0030707 | ovarian follicle cell development                                                   |
| GO:0030716 | oocyte fate determination                                                           |
| GO:0030717 | karyosome formation                                                                 |
| GO:0030720 | germarium-derived egg chamber formation                                             |
| GO:0030727 | germarium-derived female germ-line cyst formation                                   |
| GO:0030894 | replication fork                                                                    |
| GO:0031023 | microtubule organizing center organization and biogenesis                           |
| GO:0031323 | regulation of cellular metabolic process                                            |
| GO:0031324 | negative regulation of cellular metabolic process                                   |
| GO:0031325 | positive regulation of cellular metabolic process                                   |
| GO:0031519 | PcG protein complex                                                                 |
| GO:0031523 | Myb complex                                                                         |
| GO:0031577 | spindle checkpoint                                                                  |
| GO:0031965 | nuclear envelope                                                                    |
| GO:0031974 | membrane-enclosed lumen                                                             |
| GO:0031981 | nuclear lumen                                                                       |
| GO:0032502 | developmental process                                                               |
| GO:0032774 | RNA biosynthetic process                                                            |
| GO:0032837 | distributive segregation                                                            |
| GO:0032991 | macromolecular complex                                                              |
| GO:0033036 | macromolecule localization                                                          |
| GO:0033301 | cell cycle comprising mitosis without cytokinesis                                   |
| GO:0035102 | PRC1 complex                                                                        |

|            |                                                                                              |
|------------|----------------------------------------------------------------------------------------------|
| GO:0035186 | syncytial blastoderm mitotic cell cycle                                                      |
| GO:0035303 | regulation of dephosphorylation                                                              |
| GO:0035304 | regulation of protein amino acid dephosphorylation                                           |
| GO:0042054 | histone methyltransferase activity                                                           |
| GO:0042575 | DNA polymerase complex                                                                       |
| GO:0043138 | 3'-5' DNA helicase activity                                                                  |
| GO:0043170 | macromolecule metabolic process                                                              |
| GO:0043226 | organelle                                                                                    |
| GO:0043227 | membrane-bound organelle                                                                     |
| GO:0043228 | non-membrane-bound organelle                                                                 |
| GO:0043229 | intracellular organelle                                                                      |
| GO:0043231 | intracellular membrane-bound organelle                                                       |
| GO:0043232 | intracellular non-membrane-bound organelle                                                   |
| GO:0043233 | organelle lumen                                                                              |
| GO:0043234 | protein complex                                                                              |
| GO:0043283 | biopolymer metabolic process                                                                 |
| GO:0043412 | biopolymer modification                                                                      |
| GO:0043414 | biopolymer methylation                                                                       |
| GO:0043596 | nuclear replication fork                                                                     |
| GO:0043601 | nuclear replication fork                                                                     |
| GO:0043623 | cellular protein complex assembly                                                            |
| GO:0043687 | post-translational protein modification                                                      |
| GO:0044237 | cellular metabolic process                                                                   |
| GO:0044238 | primary metabolic process                                                                    |
| GO:0044422 | organelle                                                                                    |
| GO:0044424 | intracellular                                                                                |
| GO:0044427 | chromosome                                                                                   |
| GO:0044428 | nucleus                                                                                      |
| GO:0044430 | cytoskeleton                                                                                 |
| GO:0044446 | intracellular organelle                                                                      |
| GO:0044450 | microtubule organizing center                                                                |
| GO:0044451 | nuclear lumen                                                                                |
| GO:0044453 | nuclear envelope                                                                             |
| GO:0044454 | nuclear chromosome                                                                           |
| GO:0044464 | cell                                                                                         |
| GO:0045132 | M phase of meiotic cell cycle                                                                |
| GO:0045448 | mitotic cell cycle, embryonic                                                                |
| GO:0045449 | regulation of transcription                                                                  |
| GO:0045786 | negative regulation of progression through cell cycle                                        |
| GO:0045892 | negative regulation of transcription, DNA-dependent                                          |
| GO:0045893 | positive regulation of transcription, DNA-dependent                                          |
| GO:0045934 | negative regulation of nucleobase, nucleoside, nucleotide and nucleic acid metabolic process |
| GO:0045935 | positive regulation of nucleobase, nucleoside, nucleotide and nucleic acid metabolic process |
| GO:0045941 | positive regulation of transcription                                                         |
| GO:0046974 | histone lysine N-methyltransferase activity (H3-K9 specific)                                 |
| GO:0048024 | regulation of nuclear mRNA splicing, via spliceosome                                         |
| GO:0048134 | germ cell development                                                                        |
| GO:0048135 | female germ-line cyst formation                                                              |
| GO:0048468 | cell development                                                                             |
| GO:0048477 | oogenesis                                                                                    |
| GO:0048518 | positive regulation of biological process                                                    |
| GO:0048519 | negative regulation of biological process                                                    |
| GO:0048522 | positive regulation of cellular process                                                      |
| GO:0048523 | negative regulation of cellular process                                                      |
| GO:0048646 | anatomical structure development                                                             |
| GO:0048856 | anatomical structure development                                                             |
| GO:0048869 | cellular developmental process                                                               |
| GO:0050684 | regulation of mRNA processing                                                                |
| GO:0050789 | regulation of biological process                                                             |
| GO:0050794 | regulation of cellular process                                                               |
| GO:0051052 | regulation of DNA metabolic process                                                          |
| GO:0051053 | negative regulation of DNA metabolic process                                                 |

|            |                                                  |
|------------|--------------------------------------------------|
| GO:0051170 | nuclear import                                   |
| GO:0051174 | regulation of phosphorus metabolic process       |
| GO:0051225 | spindle assembly                                 |
| GO:0051246 | regulation of protein metabolic process          |
| GO:0051248 | negative regulation of protein metabolic process |
| GO:0051252 | regulation of RNA metabolic process              |
| GO:0051276 | chromosome organization and biogenesis           |
| GO:0051297 | centrosome organization and biogenesis           |
| GO:0051301 | cell division                                    |
| GO:0051320 | interphase                                       |
| GO:0051321 | meiotic cell cycle                               |
| GO:0051322 | anaphase                                         |
| GO:0051325 | interphase                                       |
| GO:0051327 | M phase of meiotic cell cycle                    |
| GO:0051329 | interphase of mitotic cell cycle                 |
| GO:0051726 | regulation of cell cycle                         |
| GO:0065001 | specification of axis polarity                   |
| GO:0065003 | macromolecular complex assembly                  |
| GO:0065004 | protein-DNA complex assembly                     |
| GO:0065007 | biological regulation                            |

Table S1G: Gene Ontologies Up-regulated in dSir2 overexpression. All gene ontologies have at least 5 genes in the GO and p value < 0.05.

|            |                                        |
|------------|----------------------------------------|
| GO:0000267 | cell fraction                          |
| GO:0003012 | muscle system process                  |
| GO:0003779 | actin binding                          |
| GO:0004175 | endopeptidase activity                 |
| GO:0004252 | serine-type endopeptidase activity     |
| GO:0004857 | enzyme inhibitor activity              |
| GO:0004866 | endopeptidase inhibitor activity       |
| GO:0005200 | structural constituent of cytoskeleton |
| GO:0005372 | water transporter activity             |
| GO:0005388 | calcium-transporting ATPase activity   |
| GO:0005509 | calcium ion binding                    |
| GO:0005578 | proteinaceous extracellular matrix     |
| GO:0005604 | basement membrane                      |
| GO:0005624 | membrane fraction                      |
| GO:0005792 | microsome                              |
| GO:0005856 | cytoskeleton                           |
| GO:0005859 | muscle myosin complex                  |
| GO:0005865 | sarcomere                              |
| GO:0006629 | lipid metabolic process                |
| GO:0006816 | calcium ion transport                  |
| GO:0006874 | cellular calcium ion homeostasis       |
| GO:0006875 | cellular metal ion homeostasis         |
| GO:0006936 | muscle contraction                     |
| GO:0006952 | defense response                       |
| GO:0007498 | mesoderm development                   |
| GO:0007519 | skeletal muscle development            |
| GO:0007601 | visual perception                      |
| GO:0007602 | phototransduction                      |
| GO:0007604 | phototransduction, UV                  |
| GO:0008233 | peptidase activity                     |
| GO:0008236 | serine-type peptidase activity         |
| GO:0008238 | exopeptidase activity                  |
| GO:0008252 | nucleotidase activity                  |
| GO:0008253 | 5'-nucleotidase activity               |
| GO:0009055 | electron carrier activity              |
| GO:0009314 | response to radiation                  |
| GO:0009411 | response to UV                         |

|            |                                                                                                       |
|------------|-------------------------------------------------------------------------------------------------------|
| GO:0009416 | response to light stimulus                                                                            |
| GO:0009581 | detection of external stimulus                                                                        |
| GO:0009582 | detection of abiotic stimulus                                                                         |
| GO:0009583 | detection of light stimulus                                                                           |
| GO:0009584 | detection of visible light                                                                            |
| GO:0009589 | detection of UV                                                                                       |
| GO:0009605 | response to external stimulus                                                                         |
| GO:0009636 | response to toxin                                                                                     |
| GO:0009888 | organ development                                                                                     |
| GO:0009968 | negative regulation of signal transduction                                                            |
| GO:0014706 | striated muscle development                                                                           |
| GO:0015020 | glucuronosyltransferase activity                                                                      |
| GO:0015085 | calcium ion transmembrane transporter activity                                                        |
| GO:0015291 | secondary active transmembrane transporter activity                                                   |
| GO:0015629 | actin cytoskeleton                                                                                    |
| GO:0015674 | di-, tri-valent inorganic cation transport                                                            |
| GO:0016028 | rhabdomere                                                                                            |
| GO:0016059 | deactivation of rhodopsin mediated signaling                                                          |
| GO:0016460 | myosin II complex                                                                                     |
| GO:0016491 | oxidoreductase activity                                                                               |
| GO:0016705 | oxidoreductase activity, acting on paired donors, with incorporation or reduction of molecular oxygen |
| GO:0016787 | hydrolase activity                                                                                    |
| GO:0016791 | phosphoric monoester hydrolase activity                                                               |
| GO:0017171 | serine hydrolase activity                                                                             |
| GO:0019203 | carbohydrate phosphatase activity                                                                     |
| GO:0019725 | cellular homeostasis                                                                                  |
| GO:0019829 | cation-transporting ATPase activity                                                                   |
| GO:0022804 | active transmembrane transporter activity                                                             |
| GO:0022857 | transmembrane transporter activity                                                                    |
| GO:0022892 | substrate-specific transporter activity                                                               |
| GO:0030016 | myofibril                                                                                             |
| GO:0030017 | sarcomere                                                                                             |
| GO:0030239 | myoblast maturation                                                                                   |
| GO:0030414 | protease inhibitor activity                                                                           |
| GO:0031012 | extracellular matrix                                                                                  |
| GO:0042578 | phosphoric ester hydrolase activity                                                                   |
| GO:0042592 | homeostatic process                                                                                   |
| GO:0042598 | vesicular fraction                                                                                    |
| GO:0042692 | muscle cell differentiation                                                                           |
| GO:0042708 | elastase activity                                                                                     |
| GO:0043167 | ion binding                                                                                           |
| GO:0043169 | cation binding                                                                                        |
| GO:0043292 | contractile fiber                                                                                     |
| GO:0044420 | extracellular matrix                                                                                  |
| GO:0044421 | extracellular region                                                                                  |
| GO:0044430 | cytoskeleton                                                                                          |
| GO:0044449 | contractile fiber                                                                                     |
| GO:0045445 | skeletal muscle fiber development                                                                     |
| GO:0046872 | metal ion binding                                                                                     |
| GO:0048469 | cell development                                                                                      |
| GO:0048627 | skeletal muscle fiber development                                                                     |
| GO:0048628 | myoblast maturation                                                                                   |
| GO:0050906 | detection of stimulus during sensory perception                                                       |
| GO:0050908 | detection of light stimulus during visual perception                                                  |
| GO:0050953 | sensory perception of light stimulus                                                                  |
| GO:0050962 | detection of light stimulus during sensory perception                                                 |
| GO:0051146 | striated muscle cell differentiation                                                                  |
| GO:0051606 | detection of stimulus                                                                                 |
| GO:0055001 | muscle cell development                                                                               |
| GO:0055002 | striated muscle cell development                                                                      |
| GO:0055065 | metal ion homeostasis                                                                                 |
| GO:0055074 | calcium ion homeostasis                                                                               |

Table S1H: Gene Ontologies Down-regulated in dSir2 overexpression. All gene ontologies have at least 5 genes in the GO and p value < 0.05.

|            |                                                                       |
|------------|-----------------------------------------------------------------------|
| GO:0000070 | M phase of mitotic cell cycle                                         |
| GO:0000074 | regulation of progression through cell cycle                          |
| GO:0000079 | regulation of cyclin-dependent protein kinase activity                |
| GO:0000082 | interphase of mitotic cell cycle                                      |
| GO:0000087 | M phase of mitotic cell cycle                                         |
| GO:0000228 | nuclear chromosome                                                    |
| GO:0000278 | mitotic cell cycle                                                    |
| GO:0000279 | M phase                                                               |
| GO:0000578 | embryonic axis specification                                          |
| GO:0000775 | chromosome, pericentric region                                        |
| GO:0000785 | chromatin                                                             |
| GO:0000792 | heterochromatin                                                       |
| GO:0000793 | condensed chromosome                                                  |
| GO:0000794 | condensed nuclear chromosome                                          |
| GO:0000808 | origin recognition complex                                            |
| GO:0000819 | sister chromatid segregation                                          |
| GO:0000902 | cell morphogenesis                                                    |
| GO:0000910 | cytokinesis                                                           |
| GO:0001709 | cell fate commitment                                                  |
| GO:0003676 | nucleic acid binding                                                  |
| GO:0003677 | DNA binding                                                           |
| GO:0003682 | chromatin binding                                                     |
| GO:0004437 | inositol or phosphatidylinositol phosphatase activity                 |
| GO:0004672 | protein kinase activity                                               |
| GO:0004674 | protein serine/threonine kinase activity                              |
| GO:0005083 | small GTPase regulator activity                                       |
| GO:0005515 | protein binding                                                       |
| GO:0005616 | extracellular space                                                   |
| GO:0005622 | intracellular                                                         |
| GO:0005623 | cell                                                                  |
| GO:0005634 | nucleus                                                               |
| GO:0005654 | nuclear lumen                                                         |
| GO:0005664 | nuclear origin of replication recognition complex                     |
| GO:0005667 | transcription factor complex                                          |
| GO:0005694 | chromosome                                                            |
| GO:0005700 | polytene chromosome                                                   |
| GO:0005720 | nuclear heterochromatin                                               |
| GO:0005725 | intercalary heterochromatin                                           |
| GO:0005819 | spindle                                                               |
| GO:0005856 | cytoskeleton                                                          |
| GO:0005938 | cell cortex                                                           |
| GO:0006139 | nucleobase, nucleoside, nucleotide and nucleic acid metabolic process |
| GO:0006259 | DNA metabolic process                                                 |
| GO:0006260 | DNA replication                                                       |
| GO:0006261 | DNA-dependent DNA replication                                         |
| GO:0006281 | DNA repair                                                            |
| GO:0006298 | mismatch repair                                                       |
| GO:0006323 | DNA packaging                                                         |
| GO:0006325 | establishment and/or maintenance of chromatin architecture            |
| GO:0006350 | transcription                                                         |
| GO:0006351 | transcription, DNA-dependent                                          |
| GO:0006355 | regulation of transcription, DNA-dependent                            |
| GO:0006357 | regulation of transcription from RNA polymerase II promoter           |
| GO:0006366 | transcription from RNA polymerase II promoter                         |
| GO:0006396 | RNA processing                                                        |
| GO:0006464 | protein modification process                                          |
| GO:0006468 | protein amino acid phosphorylation                                    |

|            |                                                                                     |
|------------|-------------------------------------------------------------------------------------|
| GO:0006793 | phosphorus metabolic process                                                        |
| GO:0006796 | phosphate metabolic process                                                         |
| GO:0006950 | response to stress                                                                  |
| GO:0006974 | response to DNA damage stimulus                                                     |
| GO:0006996 | organelle organization and biogenesis                                               |
| GO:0007049 | cell cycle                                                                          |
| GO:0007059 | chromosome segregation                                                              |
| GO:0007067 | M phase of mitotic cell cycle                                                       |
| GO:0007076 | M phase of mitotic cell cycle                                                       |
| GO:0007088 | regulation of mitosis                                                               |
| GO:0007143 | female meiosis                                                                      |
| GO:0007154 | cell communication                                                                  |
| GO:0007165 | signal transduction                                                                 |
| GO:0007166 | cell surface receptor linked signal transduction                                    |
| GO:0007167 | enzyme linked receptor protein signaling pathway                                    |
| GO:0007169 | transmembrane receptor protein tyrosine kinase signaling pathway                    |
| GO:0007242 | intracellular signaling cascade                                                     |
| GO:0007264 | small GTPase mediated signal transduction                                           |
| GO:0007265 | Ras protein signal transduction                                                     |
| GO:0007275 | multicellular organismal development                                                |
| GO:0007276 | gamete generation                                                                   |
| GO:0007292 | female gamete generation                                                            |
| GO:0007293 | germarium-derived egg chamber formation                                             |
| GO:0007350 | blastoderm segmentation                                                             |
| GO:0007351 | blastoderm segmentation                                                             |
| GO:0007399 | nervous system development                                                          |
| GO:0008283 | cell proliferation                                                                  |
| GO:0008293 | torso signaling pathway                                                             |
| GO:0008356 | asymmetric cell division                                                            |
| GO:0008360 | regulation of cell shape                                                            |
| GO:0008375 | acetylglucosaminyltransferase activity                                              |
| GO:0008595 | blastoderm segmentation                                                             |
| GO:0009653 | anatomical structure development                                                    |
| GO:0009719 | response to endogenous stimulus                                                     |
| GO:0009790 | embryonic development                                                               |
| GO:0009880 | embryonic development                                                               |
| GO:0009892 | negative regulation of metabolic process                                            |
| GO:0009893 | positive regulation of metabolic process                                            |
| GO:0010467 | gene expression                                                                     |
| GO:0010468 | regulation of gene expression                                                       |
| GO:0015630 | microtubule cytoskeleton                                                            |
| GO:0016043 | cellular component organization and biogenesis                                      |
| GO:0016070 | RNA metabolic process                                                               |
| GO:0016301 | kinase activity                                                                     |
| GO:0016310 | phosphorylation                                                                     |
| GO:0016476 | shape changes of embryonic cells                                                    |
| GO:0016481 | negative regulation of transcription                                                |
| GO:0016563 | transcription activator activity                                                    |
| GO:0016568 | chromatin modification                                                              |
| GO:0016572 | histone phosphorylation                                                             |
| GO:0016740 | transferase activity                                                                |
| GO:0016772 | transferase activity, transferring phosphorus-containing groups                     |
| GO:0016773 | phosphotransferase activity, alcohol group as acceptor                              |
| GO:0017145 | stem cell division                                                                  |
| GO:0019219 | regulation of nucleobase, nucleoside, nucleotide and nucleic acid metabolic process |
| GO:0019222 | regulation of metabolic process                                                     |
| GO:0019953 | sexual reproduction                                                                 |
| GO:0019992 | diacylglycerol binding                                                              |
| GO:0022008 | neurogenesis                                                                        |
| GO:0022402 | cell cycle                                                                          |
| GO:0022403 | cell cycle phase                                                                    |
| GO:0022603 | regulation of anatomical structure morphogenesis                                    |

|            |                                                                                              |
|------------|----------------------------------------------------------------------------------------------|
| GO:0022604 | regulation of cell morphogenesis                                                             |
| GO:0030154 | cell differentiation                                                                         |
| GO:0030182 | generation of neurons                                                                        |
| GO:0030496 | midbody                                                                                      |
| GO:0030695 | GTPase regulator activity                                                                    |
| GO:0030727 | germarium-derived female germ-line cyst formation                                            |
| GO:0031323 | regulation of cellular metabolic process                                                     |
| GO:0031324 | negative regulation of cellular metabolic process                                            |
| GO:0031325 | positive regulation of cellular metabolic process                                            |
| GO:0031497 | chromatin assembly                                                                           |
| GO:0031519 | PcG protein complex                                                                          |
| GO:0032502 | developmental process                                                                        |
| GO:0032774 | RNA biosynthetic process                                                                     |
| GO:0032837 | distributive segregation                                                                     |
| GO:0032989 | cellular structure morphogenesis                                                             |
| GO:0033301 | cell cycle comprising mitosis without cytokinesis                                            |
| GO:0035102 | PRC1 complex                                                                                 |
| GO:0035186 | syncytial blastoderm mitotic cell cycle                                                      |
| GO:0035282 | segmentation                                                                                 |
| GO:0042078 | germ cell development                                                                        |
| GO:0043170 | macromolecule metabolic process                                                              |
| GO:0043226 | organelle                                                                                    |
| GO:0043227 | membrane-bound organelle                                                                     |
| GO:0043228 | non-membrane-bound organelle                                                                 |
| GO:0043229 | intracellular organelle                                                                      |
| GO:0043231 | intracellular membrane-bound organelle                                                       |
| GO:0043232 | intracellular non-membrane-bound organelle                                                   |
| GO:0043234 | protein complex                                                                              |
| GO:0043283 | biopolymer metabolic process                                                                 |
| GO:0043412 | biopolymer modification                                                                      |
| GO:0043687 | post-translational protein modification                                                      |
| GO:0044237 | cellular metabolic process                                                                   |
| GO:0044238 | primary metabolic process                                                                    |
| GO:0044422 | organelle                                                                                    |
| GO:0044424 | intracellular                                                                                |
| GO:0044427 | chromosome                                                                                   |
| GO:0044428 | nucleus                                                                                      |
| GO:0044430 | cytoskeleton                                                                                 |
| GO:0044446 | intracellular organelle                                                                      |
| GO:0044451 | nuclear lumen                                                                                |
| GO:0044454 | nuclear chromosome                                                                           |
| GO:0044464 | cell                                                                                         |
| GO:0045005 | DNA-dependent DNA replication                                                                |
| GO:0045448 | mitotic cell cycle, embryonic                                                                |
| GO:0045449 | regulation of transcription                                                                  |
| GO:0045786 | negative regulation of progression through cell cycle                                        |
| GO:0045892 | negative regulation of transcription, DNA-dependent                                          |
| GO:0045935 | positive regulation of nucleobase, nucleoside, nucleotide and nucleic acid metabolic process |
| GO:0045941 | positive regulation of transcription                                                         |
| GO:0048134 | germ cell development                                                                        |
| GO:0048135 | female germ-line cyst formation                                                              |
| GO:0048477 | oogenesis                                                                                    |
| GO:0048513 | organ development                                                                            |
| GO:0048518 | positive regulation of biological process                                                    |
| GO:0048519 | negative regulation of biological process                                                    |
| GO:0048522 | positive regulation of cellular process                                                      |
| GO:0048523 | negative regulation of cellular process                                                      |
| GO:0048646 | anatomical structure development                                                             |
| GO:0048699 | generation of neurons                                                                        |
| GO:0048731 | system development                                                                           |
| GO:0048856 | anatomical structure development                                                             |
| GO:0048869 | cellular developmental process                                                               |

|            |                                        |
|------------|----------------------------------------|
| GO:0050789 | regulation of biological process       |
| GO:0050793 | regulation of developmental process    |
| GO:0050794 | regulation of cellular process         |
| GO:0051276 | chromosome organization and biogenesis |
| GO:0051301 | cell division                          |
| GO:0051325 | interphase                             |
| GO:0051329 | interphase of mitotic cell cycle       |
| GO:0051726 | regulation of cell cycle               |
| GO:0065007 | biological regulation                  |

Table S11: Gene Ontologies Up-regulated in yw, w1118 DR and dSir2 overexpression All gene ontologies have at least 5 genes in the GO and p value < 0.05.

|            |                                                     |
|------------|-----------------------------------------------------|
| GO:0000267 | cell fraction                                       |
| GO:0003779 | actin binding                                       |
| GO:0004175 | endopeptidase activity                              |
| GO:0004252 | serine-type endopeptidase activity                  |
| GO:0005200 | structural constituent of cytoskeleton              |
| GO:0005509 | calcium ion binding                                 |
| GO:0005578 | proteinaceous extracellular matrix                  |
| GO:0005604 | basement membrane                                   |
| GO:0005624 | membrane fraction                                   |
| GO:0005792 | microsome                                           |
| GO:0005859 | muscle myosin complex                               |
| GO:0005865 | sarcomere                                           |
| GO:0006629 | lipid metabolic process                             |
| GO:0006874 | cellular calcium ion homeostasis                    |
| GO:0006952 | defense response                                    |
| GO:0007498 | mesoderm development                                |
| GO:0007519 | skeletal muscle development                         |
| GO:0007601 | visual perception                                   |
| GO:0007602 | phototransduction                                   |
| GO:0008233 | peptidase activity                                  |
| GO:0008236 | serine-type peptidase activity                      |
| GO:0008238 | exopeptidase activity                               |
| GO:0008253 | 5'-nucleotidase activity                            |
| GO:0009314 | response to radiation                               |
| GO:0009416 | response to light stimulus                          |
| GO:0009581 | detection of external stimulus                      |
| GO:0009582 | detection of abiotic stimulus                       |
| GO:0009583 | detection of light stimulus                         |
| GO:0009584 | detection of visible light                          |
| GO:0009605 | response to external stimulus                       |
| GO:0009888 | organ development                                   |
| GO:0014706 | striated muscle development                         |
| GO:0015020 | glucuronosyltransferase activity                    |
| GO:0015291 | secondary active transmembrane transporter activity |
| GO:0015629 | actin cytoskeleton                                  |
| GO:0016028 | rhabdomere                                          |
| GO:0016059 | deactivation of rhodopsin mediated signaling        |
| GO:0016460 | myosin II complex                                   |
| GO:0016787 | hydrolase activity                                  |
| GO:0016791 | phosphoric monoester hydrolase activity             |
| GO:0017171 | serine hydrolase activity                           |
| GO:0022804 | active transmembrane transporter activity           |
| GO:0022857 | transmembrane transporter activity                  |
| GO:0022892 | substrate-specific transporter activity             |
| GO:0030016 | myofibril                                           |
| GO:0030017 | sarcomere                                           |
| GO:0030239 | myoblast maturation                                 |
| GO:0031012 | extracellular matrix                                |



|            |                                                       |
|------------|-------------------------------------------------------|
| GO:0042578 | phosphoric ester hydrolase activity                   |
| GO:0042592 | homeostatic process                                   |
| GO:0042598 | vesicular fraction                                    |
| GO:0042692 | muscle cell differentiation                           |
| GO:0043167 | ion binding                                           |
| GO:0043169 | cation binding                                        |
| GO:0043292 | contractile fiber                                     |
| GO:0044420 | extracellular matrix                                  |
| GO:0044421 | extracellular region                                  |
| GO:0044449 | contractile fiber                                     |
| GO:0045445 | skeletal muscle fiber development                     |
| GO:0046872 | metal ion binding                                     |
| GO:0048469 | cell development                                      |
| GO:0048627 | skeletal muscle fiber development                     |
| GO:0048628 | myoblast maturation                                   |
| GO:0050906 | detection of stimulus during sensory perception       |
| GO:0050908 | detection of light stimulus during visual perception  |
| GO:0050953 | sensory perception of light stimulus                  |
| GO:0050962 | detection of light stimulus during sensory perception |
| GO:0051146 | striated muscle cell differentiation                  |
| GO:0051606 | detection of stimulus                                 |
| GO:0055001 | muscle cell development                               |
| GO:0055002 | striated muscle cell development                      |
| GO:0055074 | calcium ion homeostasis                               |

Table S1J: Gene Ontologies Down-regulated in yw, w1118 DR and dSir2 overexpression All gene ontologies have at least 5 genes in the GO and p value < 0.05.

|            |                                                                       |
|------------|-----------------------------------------------------------------------|
| GO:0000070 | M phase of mitotic cell cycle                                         |
| GO:0000074 | regulation of progression through cell cycle                          |
| GO:0000082 | interphase of mitotic cell cycle                                      |
| GO:0000087 | M phase of mitotic cell cycle                                         |
| GO:0000228 | nuclear chromosome                                                    |
| GO:0000278 | mitotic cell cycle                                                    |
| GO:0000279 | M phase                                                               |
| GO:0000578 | embryonic axis specification                                          |
| GO:0000775 | chromosome, pericentric region                                        |
| GO:0000785 | chromatin                                                             |
| GO:0000792 | heterochromatin                                                       |
| GO:0000793 | condensed chromosome                                                  |
| GO:0000808 | origin recognition complex                                            |
| GO:0000819 | sister chromatid segregation                                          |
| GO:0000910 | cytokinesis                                                           |
| GO:0003676 | nucleic acid binding                                                  |
| GO:0003677 | DNA binding                                                           |
| GO:0003682 | chromatin binding                                                     |
| GO:0004672 | protein kinase activity                                               |
| GO:0004674 | protein serine/threonine kinase activity                              |
| GO:0005515 | protein binding                                                       |
| GO:0005622 | intracellular                                                         |
| GO:0005623 | cell                                                                  |
| GO:0005634 | nucleus                                                               |
| GO:0005654 | nuclear lumen                                                         |
| GO:0005664 | nuclear origin of replication recognition complex                     |
| GO:0005667 | transcription factor complex                                          |
| GO:0005694 | chromosome                                                            |
| GO:0005700 | polytene chromosome                                                   |
| GO:0005819 | spindle                                                               |
| GO:0005856 | cytoskeleton                                                          |
| GO:0006139 | nucleobase, nucleoside, nucleotide and nucleic acid metabolic process |
| GO:0006259 | DNA metabolic process                                                 |

|            |                                                                                     |
|------------|-------------------------------------------------------------------------------------|
| GO:0006260 | DNA replication                                                                     |
| GO:0006261 | DNA-dependent DNA replication                                                       |
| GO:0006281 | DNA repair                                                                          |
| GO:0006350 | transcription                                                                       |
| GO:0006351 | transcription, DNA-dependent                                                        |
| GO:0006355 | regulation of transcription, DNA-dependent                                          |
| GO:0006357 | regulation of transcription from RNA polymerase II promoter                         |
| GO:0006366 | transcription from RNA polymerase II promoter                                       |
| GO:0006396 | RNA processing                                                                      |
| GO:0006464 | protein modification process                                                        |
| GO:0006468 | protein amino acid phosphorylation                                                  |
| GO:0006793 | phosphorus metabolic process                                                        |
| GO:0006796 | phosphate metabolic process                                                         |
| GO:0006950 | response to stress                                                                  |
| GO:0006974 | response to DNA damage stimulus                                                     |
| GO:0006996 | organelle organization and biogenesis                                               |
| GO:0007049 | cell cycle                                                                          |
| GO:0007059 | chromosome segregation                                                              |
| GO:0007067 | M phase of mitotic cell cycle                                                       |
| GO:0007076 | M phase of mitotic cell cycle                                                       |
| GO:0007088 | regulation of mitosis                                                               |
| GO:0007143 | female meiosis                                                                      |
| GO:0007275 | multicellular organismal development                                                |
| GO:0007276 | gamete generation                                                                   |
| GO:0007292 | female gamete generation                                                            |
| GO:0007293 | germarium-derived egg chamber formation                                             |
| GO:0007351 | blastoderm segmentation                                                             |
| GO:0008283 | cell proliferation                                                                  |
| GO:0008356 | asymmetric cell division                                                            |
| GO:0008375 | acetylglucosaminyltransferase activity                                              |
| GO:0008595 | blastoderm segmentation                                                             |
| GO:0009653 | anatomical structure development                                                    |
| GO:0009719 | response to endogenous stimulus                                                     |
| GO:0009790 | embryonic development                                                               |
| GO:0009880 | embryonic development                                                               |
| GO:0009892 | negative regulation of metabolic process                                            |
| GO:0009893 | positive regulation of metabolic process                                            |
| GO:0010467 | gene expression                                                                     |
| GO:0010468 | regulation of gene expression                                                       |
| GO:0015630 | microtubule cytoskeleton                                                            |
| GO:0016043 | cellular component organization and biogenesis                                      |
| GO:0016070 | RNA metabolic process                                                               |
| GO:0016301 | kinase activity                                                                     |
| GO:0016310 | phosphorylation                                                                     |
| GO:0016481 | negative regulation of transcription                                                |
| GO:0016563 | transcription activator activity                                                    |
| GO:0016568 | chromatin modification                                                              |
| GO:0016572 | histone phosphorylation                                                             |
| GO:0016740 | transferase activity                                                                |
| GO:0016772 | transferase activity, transferring phosphorus-containing groups                     |
| GO:0016773 | phosphotransferase activity, alcohol group as acceptor                              |
| GO:0019219 | regulation of nucleobase, nucleoside, nucleotide and nucleic acid metabolic process |
| GO:0019222 | regulation of metabolic process                                                     |
| GO:0019953 | sexual reproduction                                                                 |
| GO:0022402 | cell cycle                                                                          |
| GO:0022403 | cell cycle phase                                                                    |
| GO:0030154 | cell differentiation                                                                |
| GO:0030496 | midbody                                                                             |
| GO:0030727 | germarium-derived female germ-line cyst formation                                   |
| GO:0031323 | regulation of cellular metabolic process                                            |
| GO:0031324 | negative regulation of cellular metabolic process                                   |
| GO:0031325 | positive regulation of cellular metabolic process                                   |

|            |                                                                                              |
|------------|----------------------------------------------------------------------------------------------|
| GO:0031519 | PcG protein complex                                                                          |
| GO:0032502 | developmental process                                                                        |
| GO:0032774 | RNA biosynthetic process                                                                     |
| GO:0032837 | distributive segregation                                                                     |
| GO:0033301 | cell cycle comprising mitosis without cytokinesis                                            |
| GO:0035102 | PRC1 complex                                                                                 |
| GO:0035186 | syncytial blastoderm mitotic cell cycle                                                      |
| GO:0043170 | macromolecule metabolic process                                                              |
| GO:0043226 | organelle                                                                                    |
| GO:0043227 | membrane-bound organelle                                                                     |
| GO:0043228 | non-membrane-bound organelle                                                                 |
| GO:0043229 | intracellular organelle                                                                      |
| GO:0043231 | intracellular membrane-bound organelle                                                       |
| GO:0043232 | intracellular non-membrane-bound organelle                                                   |
| GO:0043234 | protein complex                                                                              |
| GO:0043283 | biopolymer metabolic process                                                                 |
| GO:0043412 | biopolymer modification                                                                      |
| GO:0043687 | post-translational protein modification                                                      |
| GO:0044237 | cellular metabolic process                                                                   |
| GO:0044238 | primary metabolic process                                                                    |
| GO:0044422 | organelle                                                                                    |
| GO:0044424 | intracellular                                                                                |
| GO:0044427 | chromosome                                                                                   |
| GO:0044428 | nucleus                                                                                      |
| GO:0044430 | cytoskeleton                                                                                 |
| GO:0044446 | intracellular organelle                                                                      |
| GO:0044451 | nuclear lumen                                                                                |
| GO:0044454 | nuclear chromosome                                                                           |
| GO:0044464 | cell                                                                                         |
| GO:0045448 | mitotic cell cycle, embryonic                                                                |
| GO:0045449 | regulation of transcription                                                                  |
| GO:0045786 | negative regulation of progression through cell cycle                                        |
| GO:0045892 | negative regulation of transcription, DNA-dependent                                          |
| GO:0045935 | positive regulation of nucleobase, nucleoside, nucleotide and nucleic acid metabolic process |
| GO:0045941 | positive regulation of transcription                                                         |
| GO:0048134 | germ cell development                                                                        |
| GO:0048135 | female germ-line cyst formation                                                              |
| GO:0048477 | oogenesis                                                                                    |
| GO:0048518 | positive regulation of biological process                                                    |
| GO:0048519 | negative regulation of biological process                                                    |
| GO:0048522 | positive regulation of cellular process                                                      |
| GO:0048523 | negative regulation of cellular process                                                      |
| GO:0048646 | anatomical structure development                                                             |
| GO:0048856 | anatomical structure development                                                             |
| GO:0048869 | cellular developmental process                                                               |
| GO:0050789 | regulation of biological process                                                             |
| GO:0050794 | regulation of cellular process                                                               |
| GO:0051276 | chromosome organization and biogenesis                                                       |
| GO:0051301 | cell division                                                                                |
| GO:0051325 | interphase                                                                                   |
| GO:0051329 | interphase of mitotic cell cycle                                                             |
| GO:0051726 | regulation of cell cycle                                                                     |
| GO:0065007 | biological regulation                                                                        |

Table S1K: Gene Ontologies Up-regulated in Dmp53 knockout. All gene ontologies have at least 5 genes in the GO and p value < 0.05.

|            |                                    |
|------------|------------------------------------|
| GO:0004175 | endopeptidase activity             |
| GO:0004252 | serine-type endopeptidase activity |
| GO:0006952 | defense response                   |
| GO:0008233 | peptidase activity                 |

|            |                                |
|------------|--------------------------------|
| GO:0008236 | serine-type peptidase activity |
| GO:0017171 | serine hydrolase activity      |
| GO:0050839 | cell adhesion molecule binding |

Table SIL: Gene Ontologies Down-regulated in Dmp53 knockout. All gene ontologies have at least 5 genes in the GO and p value < 0.05.

|            |                                                       |
|------------|-------------------------------------------------------|
| GO:0001871 | pattern binding                                       |
| GO:0004553 | hydrolase activity, hydrolyzing O-glycosyl compounds  |
| GO:0005214 | structural constituent of chitin-based cuticle        |
| GO:0005501 | retinoid binding                                      |
| GO:0005615 | extracellular space                                   |
| GO:0005616 | extracellular space                                   |
| GO:0008010 | structural constituent of chitin-based larval cuticle |
| GO:0008061 | chitin binding                                        |
| GO:0016490 | structural constituent of peritrophic membrane        |
| GO:0016491 | oxidoreductase activity                               |
| GO:0016798 | hydrolase activity, acting on glycosyl bonds          |
| GO:0016918 | retinal binding                                       |
| GO:0019840 | isoprenoid binding                                    |
| GO:0019842 | vitamin binding                                       |
| GO:0030246 | carbohydrate binding                                  |
| GO:0030247 | polysaccharide binding                                |
| GO:0042302 | structural constituent of cuticle                     |

Table SIM: Gene Ontologies Up-regulated in yw, w1118 DR, dSir2 overexpression and Dmp53 knockout. All gene ontologies have at least 5 genes in the GO and p value < 0.05. There are no common gene ontologies Down-regulated in yw, w1118 DR, dSir2 overexpression and Dmp53 knockout.

|            |                                    |
|------------|------------------------------------|
| GO:0004175 | endopeptidase activity             |
| GO:0004252 | serine-type endopeptidase activity |
| GO:0006952 | defense response                   |
| GO:0008233 | peptidase activity                 |
| GO:0008236 | serine-type peptidase activity     |
| GO:0017171 | serine hydrolase activity          |

Table SIN: Reproductive-Related Gene Ontologies Down-regulated in yw, w1118 DR. All gene ontologies have at least 5 genes in the GO and p value < 0.05. No Reproductive-Related GOs are Up-Regulated in yw, w1118 DR.

|            |                                                                          |
|------------|--------------------------------------------------------------------------|
| GO:0007126 | M phase of meiotic cell cycle                                            |
| GO:0007127 | M phase of meiotic cell cycle                                            |
| GO:0007131 | M phase of meiotic cell cycle                                            |
| GO:0007143 | female meiosis                                                           |
| GO:0007276 | gamete generation                                                        |
| GO:0007280 | pole cell migration                                                      |
| GO:0007281 | germ cell development                                                    |
| GO:0007292 | female gamete generation                                                 |
| GO:0007293 | germarium-derived egg chamber formation                                  |
| GO:0007294 | germarium-derived oocyte fate determination                              |
| GO:0007304 | ovarian follicle cell development                                        |
| GO:0007306 | ovarian follicle cell development                                        |
| GO:0007307 | ovarian follicle cell development                                        |
| GO:0007311 | maternal determination of dorsal/ventral axis, oocyte, germ-line encoded |
| GO:0008354 | germ cell migration                                                      |
| GO:0009994 | oocyte differentiation                                                   |
| GO:0016321 | female meiosis                                                           |
| GO:0019953 | sexual reproduction                                                      |
| GO:0030703 | eggshell formation                                                       |

|            |                                                   |
|------------|---------------------------------------------------|
| GO:0030706 | germarium-derived oocyte differentiation          |
| GO:0030707 | ovarian follicle cell development                 |
| GO:0030717 | karyosome formation                               |
| GO:0030720 | germarium-derived egg chamber formation           |
| GO:0030727 | germarium-derived female germ-line cyst formation |
| GO:0032837 | distributive segregation                          |
| GO:0045132 | M phase of meiotic cell cycle                     |
| GO:0048134 | germ cell development                             |
| GO:0048135 | female germ-line cyst formation                   |
| GO:0048477 | oogenesis                                         |
| GO:0051321 | meiotic cell cycle                                |
| GO:0051327 | M phase of meiotic cell cycle                     |

Table S10: Reproductive-Related Gene Ontologies Down-regulated in Canton-S DR. All gene ontologies have at least 5 genes in the GO and p value < 0.05. No Reproductive-Related GOs are Up-Regulated in Canton-S DR.

|            |                                                   |
|------------|---------------------------------------------------|
| GO:0007056 | female meiosis                                    |
| GO:0007126 | M phase of meiotic cell cycle                     |
| GO:0007127 | M phase of meiotic cell cycle                     |
| GO:0007131 | M phase of meiotic cell cycle                     |
| GO:0007143 | female meiosis                                    |
| GO:0007276 | gamete generation                                 |
| GO:0007280 | pole cell migration                               |
| GO:0007281 | germ cell development                             |
| GO:0007292 | female gamete generation                          |
| GO:0007293 | germarium-derived egg chamber formation           |
| GO:0007294 | germarium-derived oocyte fate determination       |
| GO:0007304 | ovarian follicle cell development                 |
| GO:0007306 | ovarian follicle cell development                 |
| GO:0007307 | ovarian follicle cell development                 |
| GO:0009994 | oocyte differentiation                            |
| GO:0016321 | female meiosis                                    |
| GO:0019953 | sexual reproduction                               |
| GO:0030381 | ovarian follicle cell development                 |
| GO:0030703 | eggshell formation                                |
| GO:0030706 | germarium-derived oocyte differentiation          |
| GO:0030707 | ovarian follicle cell development                 |
| GO:0030717 | karyosome formation                               |
| GO:0030720 | germarium-derived egg chamber formation           |
| GO:0030727 | germarium-derived female germ-line cyst formation |
| GO:0032837 | distributive segregation                          |
| GO:0042078 | germ cell development                             |
| GO:0045132 | M phase of meiotic cell cycle                     |
| GO:0048134 | germ cell development                             |
| GO:0048135 | female germ-line cyst formation                   |
| GO:0048477 | oogenesis                                         |
| GO:0051321 | meiotic cell cycle                                |
| GO:0051327 | M phase of meiotic cell cycle                     |

Table S1P: Reproductive-Related Gene Ontologies Down-regulated in dSir2 Overexpression. All gene ontologies have at least 5 genes in the GO and p value < 0.05. No Reproductive-Related GOs are Up-Regulated in dSir2 Overexpression.

|            |                                                   |
|------------|---------------------------------------------------|
| GO:0007143 | female meiosis                                    |
| GO:0007276 | gamete generation                                 |
| GO:0007292 | female gamete generation                          |
| GO:0007293 | germarium-derived egg chamber formation           |
| GO:0019953 | sexual reproduction                               |
| GO:0030727 | germarium-derived female germ-line cyst formation |
| GO:0032837 | distributive segregation                          |

|            |                                 |
|------------|---------------------------------|
| GO:0042078 | germ cell development           |
| GO:0048134 | germ cell development           |
| GO:0048135 | female germ-line cyst formation |
| GO:0048477 | oogenesis                       |
